# Supplementary material for: A Mediterranean diet with additional extra virgin olive oil and pistachios reduces the incidence of gestational diabetes mellitus (GDM): A randomized controlled trial: The St. Carlos GDM prevention study
Source: PubMed Central journal article supplement (PMC5648128; doi:10.1371/journal.pone.0185873), 2017-10-19
Supplement: pone.0185873.s001.pdf [file pone.0185873.s001.pdf]

```

GET
  FILE='C:\Users\acall\Desktop\Repositorio\FIS NOVIEMBRE 2016 repositorio 2.sav'.
DATASET NAME Conjunto_de_datos1 WINDOW=FRONT.
FILTER OFF.
USE ALL.
EXECUTE.
T-TEST GROUPS=GRUPO_ALEATORIZADO(1 2)
  /MISSING=ANALYSIS
  /VARIABLES=EDAD Pesopregestacional PESO_SG12 BMIPREGESTACIONAL BMISG12 GananciaPesoSG12 TASSG12 TADSG12 GLUCOSA_SG12 TSHSG12 SG12_MEDDIET_SCORE
PREG_NUTRITIONSCORE
  /CRITERIA=CI(.95).

```

## Prueba T

### Notas

|                                     |                                      |                                                                                                                                                            |
|-------------------------------------|--------------------------------------|------------------------------------------------------------------------------------------------------------------------------------------------------------|
| Resultados creados                  |                                      | 31-ago-2017 18:36:53                                                                                                                                       |
| Comentarios                         |                                      |                                                                                                                                                            |
| Entrada                             | Datos                                | C:\Users\acall\Desktop\Repositorio\FIS<br>NOVIEMBRE 2016 repositorio 2.sav                                                                                 |
|                                     | Conjunto de datos activo             | Conjunto_de_datos1                                                                                                                                         |
|                                     | Filtro                               | <ninguno>                                                                                                                                                  |
|                                     | Peso                                 | <ninguno>                                                                                                                                                  |
|                                     | Segmentar archivo                    | <ninguno>                                                                                                                                                  |
|                                     | Núm. de filas del archivo de trabajo | 1000                                                                                                                                                       |
| Tratamiento de los valores perdidos | Definición de los perdidos           | Los valores perdidos definidos por el usuario serán tratados como perdidos.                                                                                |
|                                     | Casos utilizados                     | Los estadísticos de cada análisis se basan en los casos que no tienen datos perdidos ni quedan fuera de rango en cualquiera de las variables del análisis. |

|          |                                                                                                                                                                                                                                                                           |  |                 |
|----------|---------------------------------------------------------------------------------------------------------------------------------------------------------------------------------------------------------------------------------------------------------------------------|--|-----------------|
| Sintaxis | T-TEST<br>GROUPS=GRUPO_ALEATORIZADO(1 2)<br>/MISSING=ANALYSIS<br>/VARIABLES=EDAD Pesopregestacional<br>PESO_SG12 BMIPREGESTACIONAL<br>BMISG12 GananciaPesoSG12 TASSG12<br>TADSG12 GLUCOSA_SG12 TSHSG12<br>SG12_MEDDIET_SCORE<br>PREG_NUTRITIONSCORE<br>/CRITERIA=CI(.95). |  |                 |
| Recursos | Tiempo de procesador                                                                                                                                                                                                                                                      |  | 00 00:00:00,031 |
|          | Tiempo transcurrido                                                                                                                                                                                                                                                       |  | 00 00:00:00,037 |

[Conjunto\_de\_datos1] C:\Users\acall\Desktop\Repositorio\FIS NOVIEMBRE 2016 repositorio 2.sav

#### Estadísticos de grupo

|                                                                                       | GRUPO_ALEATORIZADO  | N   | Media   | Desviación típ. | Error típ. de la media |
|---------------------------------------------------------------------------------------|---------------------|-----|---------|-----------------|------------------------|
| EDAD                                                                                  | CONTROL             | 500 | 32,73   | 5,254           | ,235                   |
|                                                                                       | INTERVENCION ACEITE | 499 | 33,19   | 5,019           | ,225                   |
|                                                                                       | OLIVA               |     |         |                 |                        |
| kg                                                                                    | CONTROL             | 496 | 61,6978 | 11,58256        | ,52007                 |
|                                                                                       | INTERVENCION ACEITE | 500 | 60,3718 | 10,38450        | ,46441                 |
|                                                                                       | OLIVA               |     |         |                 |                        |
| KG                                                                                    | CONTROL             | 491 | 63,8548 | 11,96589        | ,54001                 |
|                                                                                       | INTERVENCION ACEITE | 488 | 62,4752 | 10,53537        | ,47691                 |
|                                                                                       | OLIVA               |     |         |                 |                        |
| COMPUTE<br>BMIPREGESTACIONAL =<br>Pesopregestacional /<br>(TALLAmetros * TALLAmetros) | CONTROL             | 493 | 23,3293 | 4,02408         | ,18124                 |
|                                                                                       | INTERVENCION ACEITE | 500 | 22,8844 | 3,63283         | ,16247                 |
|                                                                                       | OLIVA               |     |         |                 |                        |
| COMPUTE BMISG12 =<br>PESO_SG12 / (TALLAmetros *<br>TALLAmetros)                       | CONTROL             | 488 | 24,1461 | 4,13320         | ,18710                 |
|                                                                                       | INTERVENCION ACEITE | 488 | 23,6746 | 3,76139         | ,17027                 |
|                                                                                       | OLIVA               |     |         |                 |                        |
| COMPUTE<br>GananciaPesoSG12 =<br>PESO_SG12 -<br>Pesopregestacional                    | CONTROL             | 488 | 2,1416  | 3,15123         | ,14265                 |
|                                                                                       | INTERVENCION ACEITE | 488 | 1,9713  | 2,68957         | ,12175                 |
|                                                                                       | OLIVA               |     |         |                 |                        |

|                            |                     |     |        |         |        |
|----------------------------|---------------------|-----|--------|---------|--------|
| TASSG12                    | CONTROL             | 201 | 106,86 | 10,432  | ,736   |
|                            | INTERVENCION ACEITE | 481 | 107,12 | 10,753  | ,490   |
|                            | OLIVA               |     |        |         |        |
| TADSG12                    | CONTROL             | 201 | 65,31  | 11,330  | ,799   |
|                            | INTERVENCION ACEITE | 481 | 65,73  | 8,608   | ,392   |
|                            | OLIVA               |     |        |         |        |
| MG/DL                      | CONTROL             | 390 | 81,72  | 6,089   | ,308   |
|                            | INTERVENCION ACEITE | 374 | 80,99  | 6,096   | ,315   |
|                            | OLIVA               |     |        |         |        |
| TSHSG12                    | CONTROL             | 389 | 1,8759 | 1,18803 | ,06024 |
|                            | INTERVENCION ACEITE | 382 | 2,0010 | 1,39213 | ,07123 |
|                            | OLIVA               |     |        |         |        |
| COMPUTE                    | CONTROL             | 497 | 4,8833 | 1,73509 | ,07783 |
| SG12_MEDDIET_SCORE =       | INTERVENCION ACEITE | 495 | 4,9758 | 1,75279 | ,07878 |
| SG12_ACEITEOLIVAMEDDIET    | OLIVA               |     |        |         |        |
| +                          |                     |     |        |         |        |
| SG12_MLACEITEDIA_MEDDIE    |                     |     |        |         |        |
| T +                        |                     |     |        |         |        |
| SG12_VERDURAS_MEDDIET +    |                     |     |        |         |        |
| SG12_FRUTAS_MEDDI...       |                     |     |        |         |        |
| COMPUTE                    | CONTROL             | 499 | ,4910  | 3,24214 | ,14514 |
| PREG_NUTRITIONSCORE =      | INTERVENCION ACEITE | 499 | ,2124  | 3,21938 | ,14412 |
| VerduraspreG + FrutapreG + | OLIVA               |     |        |         |        |
| AceiteolivapreG +          |                     |     |        |         |        |
| PescadoazulpreG +          |                     |     |        |         |        |
| PanintegralpreG +          |                     |     |        |         |        |
| Legumbrespre...            |                     |     |        |         |        |

Prueba de muestras independientes

|      |                                     | Prueba de Levene para la igualdad de varianzas |      | Prueba T para la igualdad de medias |         |                  |                      |                             |                                               |          |
|------|-------------------------------------|------------------------------------------------|------|-------------------------------------|---------|------------------|----------------------|-----------------------------|-----------------------------------------------|----------|
|      |                                     | F                                              | Sig. | t                                   | gl      | Sig. (bilateral) | Diferencia de medias | Error típ. de la diferencia | 95% Intervalo de confianza para la diferencia |          |
|      |                                     |                                                |      |                                     |         |                  |                      |                             | Inferior                                      | Superior |
| EDAD | Se han asumido varianzas iguales    | 2,169                                          | ,141 | -1,428                              | 997     | ,154             | -,464                | ,325                        | -1,102                                        | ,174     |
|      | No se han asumido varianzas iguales |                                                |      | -1,428                              | 995,095 | ,153             | -,464                | ,325                        | -1,102                                        | ,174     |
| kg   | Se han asumido varianzas iguales    | 3,346                                          | ,068 | 1,903                               | 994     | ,057             | 1,32598              | ,69694                      | -,04166                                       | 2,69363  |

|                                                                                                       |                                     |       |      |        |         |      |         |        |         |         |
|-------------------------------------------------------------------------------------------------------|-------------------------------------|-------|------|--------|---------|------|---------|--------|---------|---------|
|                                                                                                       | No se han asumido varianzas iguales |       |      | 1,902  | 980,634 | ,057 | 1,32598 | ,69725 | -,04228 | 2,69425 |
| KG                                                                                                    | Se han asumido varianzas iguales    | 2,124 | ,145 | 1,914  | 977     | ,056 | 1,37958 | ,72074 | -,03479 | 2,79396 |
|                                                                                                       | No se han asumido varianzas iguales |       |      | 1,915  | 963,005 | ,056 | 1,37958 | ,72046 | -,03427 | 2,79343 |
| COMPUTE BMIPREGESTACIONAL =                                                                           | Se han asumido varianzas iguales    | 2,558 | ,110 | 1,829  | 991     | ,068 | ,44496  | ,24322 | -,03233 | ,92224  |
| Pesopregestacional / (TALLAmetros * TALLAmetros)                                                      | No se han asumido varianzas iguales |       |      | 1,828  | 977,850 | ,068 | ,44496  | ,24340 | -,03268 | ,92259  |
| COMPUTE BMISG12 =                                                                                     | Se han asumido varianzas iguales    | 1,707 | ,192 | 1,864  | 974     | ,063 | ,47144  | ,25298 | -,02501 | ,96789  |
| PESO_SG12 / (TALLAmetros * TALLAmetros)                                                               | No se han asumido varianzas iguales |       |      | 1,864  | 965,472 | ,063 | ,47144  | ,25298 | -,02501 | ,96790  |
| COMPUTE GananciaPesoSG12 =                                                                            | Se han asumido varianzas iguales    | 1,134 | ,287 | ,908   | 974     | ,364 | ,17029  | ,18754 | -,19775 | ,53832  |
| PESO_SG12 - Pesopregestacional                                                                        | No se han asumido varianzas iguales |       |      | ,908   | 950,541 | ,364 | ,17029  | ,18754 | -,19776 | ,53833  |
| TASSG12                                                                                               | Se han asumido varianzas iguales    | ,491  | ,484 | -,288  | 680     | ,773 | -,258   | ,895   | -2,016  | 1,500   |
|                                                                                                       | No se han asumido varianzas iguales |       |      | -,292  | 385,384 | ,771 | -,258   | ,884   | -1,996  | 1,481   |
| TADSG12                                                                                               | Se han asumido varianzas iguales    | 3,133 | ,077 | -,534  | 680     | ,594 | -,425   | ,797   | -1,990  | 1,140   |
|                                                                                                       | No se han asumido varianzas iguales |       |      | -,478  | 300,815 | ,633 | -,425   | ,890   | -2,178  | 1,327   |
| MG/DL                                                                                                 | Se han asumido varianzas iguales    | 2,173 | ,141 | 1,647  | 762     | ,100 | ,726    | ,441   | -,140   | 1,591   |
|                                                                                                       | No se han asumido varianzas iguales |       |      | 1,647  | 760,589 | ,100 | ,726    | ,441   | -,140   | 1,592   |
| TSHSG12                                                                                               | Se han asumido varianzas iguales    | 2,175 | ,141 | -1,342 | 769     | ,180 | -,12502 | ,09315 | -,30788 | ,05784  |
|                                                                                                       | No se han asumido varianzas iguales |       |      | -1,340 | 746,106 | ,181 | -,12502 | ,09328 | -,30815 | ,05811  |
| COMPUTE SG12_MEDDIET_SCORE =                                                                          | Se han asumido varianzas iguales    | ,170  | ,681 | -,835  | 990     | ,404 | -,09246 | ,11074 | -,30977 | ,12486  |
| SG12_ACEITEOLIVAMEDDIET + SG12_MLACEITEDIA_MEDDIET + T + SG12_VERDURAS_MEDDIET + SG12_FRUTAS_MEDDI... | No se han asumido varianzas iguales |       |      | -,835  | 989,801 | ,404 | -,09246 | ,11074 | -,30978 | ,12486  |

|                            |                             |      |      |       |         |      |        |        |         |        |
|----------------------------|-----------------------------|------|------|-------|---------|------|--------|--------|---------|--------|
| COMPUTE                    | Se han asumido varianzas    | ,161 | ,688 | 1,362 | 996     | ,174 | ,27856 | ,20454 | -,12282 | ,67993 |
| PREG_NUTRITIONSCORE =      | iguales                     |      |      |       |         |      |        |        |         |        |
| VerduraspreG + FrutapreG + | No se han asumido varianzas |      |      | 1,362 | 995,951 | ,174 | ,27856 | ,20454 | -,12282 | ,67993 |
| AceiteolivapreG +          | iguales                     |      |      |       |         |      |        |        |         |        |
| PescadoazulpreG +          |                             |      |      |       |         |      |        |        |         |        |
| PanintegralpreG +          |                             |      |      |       |         |      |        |        |         |        |
| Legumbrespre...            |                             |      |      |       |         |      |        |        |         |        |

CROSSTABS

```

/TABLES=ETNIA AntecedentesFamiliares ANTECGEST ESTUDIOS TRABAJO NumGestac TABAQUISMO PREG_EXERCISE_SCORE BY GRUPO_ALEATORIZADO
/FORMAT=AVALUE TABLES
/CELLS=COUNT COLUMN
/COUNT ROUND CELL.

```

**Tablas de contingencia**

**Notas**

|                                     |                                      |                                                                                                                                                  |
|-------------------------------------|--------------------------------------|--------------------------------------------------------------------------------------------------------------------------------------------------|
| Resultados creados                  |                                      | 31-ago-2017 18:40:54                                                                                                                             |
| Comentarios                         |                                      |                                                                                                                                                  |
| Entrada                             | Datos                                | C:\Users\acall\Desktop\Repository\FIS<br>NOVIEMBRE 2016 repositorio 2.sav                                                                        |
|                                     | Conjunto de datos activo             | Conjunto_de_datos1                                                                                                                               |
|                                     | Filtro                               | <ninguno>                                                                                                                                        |
|                                     | Peso                                 | <ninguno>                                                                                                                                        |
|                                     | Segmentar archivo                    | <ninguno>                                                                                                                                        |
|                                     | Núm. de filas del archivo de trabajo | 1000                                                                                                                                             |
| Tratamiento de los valores perdidos | Definición de los perdidos           | Los valores perdidos definidos por el usuario serán tratados como perdidos.                                                                      |
|                                     | Casos utilizados                     | Los estadísticos de las tablas se basan en todos los casos con datos válidos en los rangos especificados para todas las variables de las tablas. |

|          |                                                                                                                                                                                                                               |  |                 |
|----------|-------------------------------------------------------------------------------------------------------------------------------------------------------------------------------------------------------------------------------|--|-----------------|
| Sintaxis | CROSSTABS<br>/TABLES=ETNIA AntecedentesFamiliares<br>ANTECGEST ESTUDIOS TRABAJO<br>NumGestac TABAQUISMO<br>PREG_EXERCISE_SCORE BY<br>GRUPO_ALEATORIZADO<br>/FORMAT=AVALUE TABLES<br>/CELLS=COUNT COLUMN<br>/COUNT ROUND CELL. |  |                 |
| Recursos | Tiempo de procesador                                                                                                                                                                                                          |  | 00 00:00:00,032 |
|          | Tiempo transcurrido                                                                                                                                                                                                           |  | 00 00:00:00,021 |
|          | Dimensiones solicitadas                                                                                                                                                                                                       |  | 2               |
|          | Casillas disponibles                                                                                                                                                                                                          |  | 174762          |

[Conjunto\_de\_datos1] C:\Users\acall\Desktop\Repositorio\FIS NOVIEMBRE 2016 repositorio 2.sav

**Resumen del procesamiento de los casos**

|                                                | Casos   |            |          |            |       |            |
|------------------------------------------------|---------|------------|----------|------------|-------|------------|
|                                                | Válidos |            | Perdidos |            | Total |            |
|                                                | N       | Porcentaje | N        | Porcentaje | N     | Porcentaje |
| ETNIA *                                        | 1000    | 100,0%     | 0        | ,0%        | 1000  | 100,0%     |
| GRUPO_ALEATORIZADO<br>AntecedentesFamiliares * | 1000    | 100,0%     | 0        | ,0%        | 1000  | 100,0%     |
| GRUPO_ALEATORIZADO<br>ANTECGEST *              | 1000    | 100,0%     | 0        | ,0%        | 1000  | 100,0%     |
| GRUPO_ALEATORIZADO<br>ESTUDIOS *               | 1000    | 100,0%     | 0        | ,0%        | 1000  | 100,0%     |
| GRUPO_ALEATORIZADO<br>TRABAJO *                | 1000    | 100,0%     | 0        | ,0%        | 1000  | 100,0%     |
| GRUPO_ALEATORIZADO<br>NumGestac *              | 998     | 99,8%      | 2        | ,2%        | 1000  | 100,0%     |
| GRUPO_ALEATORIZADO<br>TABAQUISMO *             | 1000    | 100,0%     | 0        | ,0%        | 1000  | 100,0%     |
| GRUPO_ALEATORIZADO                             |         |            |          |            |       |            |

Resumen del procesamiento de los casos

|                          | Casos   |            |          |            |       |            |
|--------------------------|---------|------------|----------|------------|-------|------------|
|                          | Válidos |            | Perdidos |            | Total |            |
|                          | N       | Porcentaje | N        | Porcentaje | N     | Porcentaje |
| ETNIA *                  | 1000    | 100,0%     | 0        | ,0%        | 1000  | 100,0%     |
| GRUPO_ALEATORIZADO       |         |            |          |            |       |            |
| AntecedentesFamiliares * | 1000    | 100,0%     | 0        | ,0%        | 1000  | 100,0%     |
| GRUPO_ALEATORIZADO       |         |            |          |            |       |            |
| ANTECGEST *              | 1000    | 100,0%     | 0        | ,0%        | 1000  | 100,0%     |
| GRUPO_ALEATORIZADO       |         |            |          |            |       |            |
| ESTUDIOS *               | 1000    | 100,0%     | 0        | ,0%        | 1000  | 100,0%     |
| GRUPO_ALEATORIZADO       |         |            |          |            |       |            |
| TRABAJO *                | 1000    | 100,0%     | 0        | ,0%        | 1000  | 100,0%     |
| GRUPO_ALEATORIZADO       |         |            |          |            |       |            |
| NumGestac *              | 998     | 99,8%      | 2        | ,2%        | 1000  | 100,0%     |
| GRUPO_ALEATORIZADO       |         |            |          |            |       |            |
| TABAQUISMO *             | 1000    | 100,0%     | 0        | ,0%        | 1000  | 100,0%     |
| GRUPO_ALEATORIZADO       |         |            |          |            |       |            |
| COMPUTE                  | 1000    | 100,0%     | 0        | ,0%        | 1000  | 100,0%     |
| PREG_EXERCISE_SCORE =    |         |            |          |            |       |            |
| PasearpreG +             |         |            |          |            |       |            |
| PisosescaleraspreG +     |         |            |          |            |       |            |
| DeportepreG *            |         |            |          |            |       |            |
| GRUPO_ALEATORIZADO       |         |            |          |            |       |            |

Tabla de contingencia ETNIA \* GRUPO\_ALEATORIZADO

|                            |                             |                                   | GRUPO_ALEATORIZADO |                              | Total |
|----------------------------|-----------------------------|-----------------------------------|--------------------|------------------------------|-------|
|                            |                             |                                   | CONTROL            | INTERVENCION<br>ACEITE OLIVA |       |
| ETNIA                      | caucasica /incluye española | Recuento                          | 306                | 326                          | 632   |
|                            |                             | % dentro de<br>GRUPO_ALEATORIZADO | 61,2%              | 65,2%                        | 63,2% |
| Eslava Rumania-Bulgaria... |                             | Recuento                          | 33                 | 19                           | 52    |
|                            |                             | % dentro de<br>GRUPO_ALEATORIZADO | 6,6%               | 3,8%                         | 5,2%  |
| Hispanica                  |                             | Recuento                          | 142                | 143                          | 285   |
|                            |                             | % dentro de<br>GRUPO_ALEATORIZADO | 28,4%              | 28,6%                        | 28,5% |
| china                      |                             | Recuento                          | 5                  | 0                            | 5     |

|             |                                   |        |        |        |
|-------------|-----------------------------------|--------|--------|--------|
|             | % dentro de<br>GRUPO_ALEATORIZADO | 1,0%   | ,0%    | ,5%    |
| africana    | Recuento                          | 10     | 6      | 16     |
|             | % dentro de<br>GRUPO_ALEATORIZADO | 2,0%   | 1,2%   | 1,6%   |
| otras       | Recuento                          | 3      | 5      | 8      |
|             | % dentro de<br>GRUPO_ALEATORIZADO | ,6%    | 1,0%   | ,8%    |
| desconocida | Recuento                          | 1      | 1      | 2      |
|             | % dentro de<br>GRUPO_ALEATORIZADO | ,2%    | ,2%    | ,2%    |
| Total       | Recuento                          | 500    | 500    | 1000   |
|             | % dentro de<br>GRUPO_ALEATORIZADO | 100,0% | 100,0% | 100,0% |

**Tabla de contingencia AntecedentesFamiliares \* GRUPO\_ALEATORIZADO**

|                        |                                   |                                   | GRUPO_ALEATORIZADO |                              | Total |
|------------------------|-----------------------------------|-----------------------------------|--------------------|------------------------------|-------|
|                        |                                   |                                   | CONTROL            | INTERVENCION<br>ACEITE OLIVA |       |
| AntecedentesFamiliares | no existen                        | Recuento                          | 156                | 120                          | 276   |
|                        |                                   | % dentro de<br>GRUPO_ALEATORIZADO | 31,2%              | 24,0%                        | 27,6% |
| diabetes               | Recuento                          | 26                                | 16                 | 42                           |       |
|                        | % dentro de<br>GRUPO_ALEATORIZADO | 5,2%                              | 3,2%               | 4,2%                         |       |
| HTA                    | Recuento                          | 36                                | 22                 | 58                           |       |
|                        | % dentro de<br>GRUPO_ALEATORIZADO | 7,2%                              | 4,4%               | 5,8%                         |       |
| dislipemia             | Recuento                          | 59                                | 49                 | 108                          |       |
|                        | % dentro de<br>GRUPO_ALEATORIZADO | 11,8%                             | 9,8%               | 10,8%                        |       |
| obesidad               | Recuento                          | 37                                | 55                 | 92                           |       |
|                        | % dentro de<br>GRUPO_ALEATORIZADO | 7,4%                              | 11,0%              | 9,2%                         |       |
| 2 situaciones          | Recuento                          | 92                                | 118                | 210                          |       |
|                        | % dentro de<br>GRUPO_ALEATORIZADO | 18,4%                             | 23,6%              | 21,0%                        |       |
| mas de 2               | Recuento                          | 93                                | 118                | 211                          |       |



|             |                                   |        |        |        |
|-------------|-----------------------------------|--------|--------|--------|
|             | % dentro de<br>GRUPO_ALEATORIZADO | 18,6%  | 23,6%  | 21,1%  |
| desconocido | Recuento                          | 1      | 2      | 3      |
|             | % dentro de<br>GRUPO_ALEATORIZADO | ,2%    | ,4%    | ,3%    |
| Total       | Recuento                          | 500    | 500    | 1000   |
|             | % dentro de<br>GRUPO_ALEATORIZADO | 100,0% | 100,0% | 100,0% |

**Tabla de contingencia ANTECGEST \* GRUPO\_ALEATORIZADO**

|           |              |                                   | GRUPO_ALEATORIZADO |                              | Total |
|-----------|--------------|-----------------------------------|--------------------|------------------------------|-------|
|           |              |                                   | CONTROL            | INTERVENCION<br>ACEITE OLIVA |       |
| ANTECGEST | ninguno      | Recuento                          | 313                | 322                          | 635   |
|           |              | % dentro de<br>GRUPO_ALEATORIZADO | 62,6%              | 64,4%                        | 63,5% |
|           | aborto       | Recuento                          | 157                | 156                          | 313   |
|           |              | % dentro de<br>GRUPO_ALEATORIZADO | 31,4%              | 31,2%                        | 31,3% |
|           | GDM          | Recuento                          | 12                 | 9                            | 21    |
|           |              | % dentro de<br>GRUPO_ALEATORIZADO | 2,4%               | 1,8%                         | 2,1%  |
|           | HTA          | Recuento                          | 5                  | 2                            | 7     |
|           |              | % dentro de<br>GRUPO_ALEATORIZADO | 1,0%               | ,4%                          | ,7%   |
|           | OTROS        | Recuento                          | 3                  | 1                            | 4     |
|           |              | % dentro de<br>GRUPO_ALEATORIZADO | ,6%                | ,2%                          | ,4%   |
|           | GDM Y OTROS  | Recuento                          | 1                  | 0                            | 1     |
|           |              | % dentro de<br>GRUPO_ALEATORIZADO | ,2%                | ,0%                          | ,1%   |
|           | HTA Y OTROS  | Recuento                          | 5                  | 0                            | 5     |
|           |              | % dentro de<br>GRUPO_ALEATORIZADO | 1,0%               | ,0%                          | ,5%   |
|           | GDM Y aborto | Recuento                          | 1                  | 5                            | 6     |
|           |              | % dentro de<br>GRUPO_ALEATORIZADO | ,2%                | 1,0%                         | ,6%   |
|           | desconocido  | Recuento                          | 1                  | 3                            | 4     |

|              |                                   |        |        |        |
|--------------|-----------------------------------|--------|--------|--------|
|              | % dentro de<br>GRUPO_ALEATORIZADO | ,2%    | ,6%    | ,4%    |
| HTA y aborto | Recuento                          | 2      | 2      | 4      |
|              | % dentro de<br>GRUPO_ALEATORIZADO | ,4%    | ,4%    | ,4%    |
| Total        | Recuento                          | 500    | 500    | 1000   |
|              | % dentro de<br>GRUPO_ALEATORIZADO | 100,0% | 100,0% | 100,0% |

Tabla de contingencia ESTUDIOS \* GRUPO\_ALEATORIZADO

|                       |              |                                   | GRUPO_ALEATORIZADO |                              | Total  |
|-----------------------|--------------|-----------------------------------|--------------------|------------------------------|--------|
|                       |              |                                   | CONTROL            | INTERVENCION<br>ACEITE OLIVA |        |
| ESTUDIOS              | SIN ESTUDIOS | Recuento                          | 0                  | 1                            | 1      |
|                       |              | % dentro de<br>GRUPO_ALEATORIZADO | ,0%                | ,2%                          | ,1%    |
| PRIMARIOS             |              | Recuento                          | 54                 | 34                           | 88     |
|                       |              | % dentro de<br>GRUPO_ALEATORIZADO | 10,8%              | 6,8%                         | 8,8%   |
| BACHILLERATO          |              | Recuento                          | 112                | 120                          | 232    |
|                       |              | % dentro de<br>GRUPO_ALEATORIZADO | 22,4%              | 24,0%                        | 23,2%  |
| FORMACION PROFESIONAL |              | Recuento                          | 76                 | 90                           | 166    |
|                       |              | % dentro de<br>GRUPO_ALEATORIZADO | 15,2%              | 18,0%                        | 16,6%  |
| UNIVERSITARIO         |              | Recuento                          | 251                | 252                          | 503    |
|                       |              | % dentro de<br>GRUPO_ALEATORIZADO | 50,2%              | 50,4%                        | 50,3%  |
| DESCONOCIDO           |              | Recuento                          | 7                  | 3                            | 10     |
|                       |              | % dentro de<br>GRUPO_ALEATORIZADO | 1,4%               | ,6%                          | 1,0%   |
| Total                 |              | Recuento                          | 500                | 500                          | 1000   |
|                       |              | % dentro de<br>GRUPO_ALEATORIZADO | 100,0%             | 100,0%                       | 100,0% |

Tabla de contingencia TRABAJO \* GRUPO\_ALEATORIZADO

|  | GRUPO_ALEATORIZADO | Total |
|--|--------------------|-------|
|--|--------------------|-------|

|               |            |                                   | CONTROL | INTERVENCION<br>ACEITE OLIVA |        |
|---------------|------------|-----------------------------------|---------|------------------------------|--------|
| TRABAJO       | ESTUDIANTE | Recuento                          | 14      | 10                           | 24     |
|               |            | % dentro de<br>GRUPO_ALEATORIZADO | 2,8%    | 2,0%                         | 2,4%   |
| AMA DE CASA   |            | Recuento                          | 10      | 6                            | 16     |
|               |            | % dentro de<br>GRUPO_ALEATORIZADO | 2,0%    | 1,2%                         | 1,6%   |
| FUERA DE CASA |            | Recuento                          | 376     | 390                          | 766    |
|               |            | % dentro de<br>GRUPO_ALEATORIZADO | 75,2%   | 78,0%                        | 76,6%  |
| EN PARO       |            | Recuento                          | 93      | 91                           | 184    |
|               |            | % dentro de<br>GRUPO_ALEATORIZADO | 18,6%   | 18,2%                        | 18,4%  |
| DESCONOCIDO   |            | Recuento                          | 7       | 3                            | 10     |
|               |            | % dentro de<br>GRUPO_ALEATORIZADO | 1,4%    | ,6%                          | 1,0%   |
| Total         |            | Recuento                          | 500     | 500                          | 1000   |
|               |            | % dentro de<br>GRUPO_ALEATORIZADO | 100,0%  | 100,0%                       | 100,0% |

**Tabla de contingencia NumGestac \* GRUPO\_ALEATORIZADO**

|           |   |                                   | GRUPO_ALEATORIZADO |                              | Total |
|-----------|---|-----------------------------------|--------------------|------------------------------|-------|
|           |   |                                   | CONTROL            | INTERVENCION<br>ACEITE OLIVA |       |
| NumGestac | 1 | Recuento                          | 211                | 232                          | 443   |
|           |   | % dentro de<br>GRUPO_ALEATORIZADO | 42,2%              | 46,6%                        | 44,4% |
|           | 2 | Recuento                          | 160                | 160                          | 320   |
|           |   | % dentro de<br>GRUPO_ALEATORIZADO | 32,0%              | 32,1%                        | 32,1% |
|           | 3 | Recuento                          | 65                 | 63                           | 128   |
|           |   | % dentro de<br>GRUPO_ALEATORIZADO | 13,0%              | 12,7%                        | 12,8% |
|           | 4 | Recuento                          | 39                 | 26                           | 65    |
|           |   | % dentro de<br>GRUPO_ALEATORIZADO | 7,8%               | 5,2%                         | 6,5%  |
|           | 5 | Recuento                          | 17                 | 12                           | 29    |

|       |                                   |        |        |        |
|-------|-----------------------------------|--------|--------|--------|
|       | % dentro de<br>GRUPO_ALEATORIZADO | 3,4%   | 2,4%   | 2,9%   |
| 6     | Recuento                          | 6      | 4      | 10     |
|       | % dentro de<br>GRUPO_ALEATORIZADO | 1,2%   | ,8%    | 1,0%   |
| 7     | Recuento                          | 2      | 0      | 2      |
|       | % dentro de<br>GRUPO_ALEATORIZADO | ,4%    | ,0%    | ,2%    |
| 10    | Recuento                          | 0      | 1      | 1      |
|       | % dentro de<br>GRUPO_ALEATORIZADO | ,0%    | ,2%    | ,1%    |
| Total | Recuento                          | 500    | 498    | 998    |
|       | % dentro de<br>GRUPO_ALEATORIZADO | 100,0% | 100,0% | 100,0% |

**Tabla de contingencia TABAQUISMO \* GRUPO\_ALEATORIZADO**

|            |                                   |                                   | GRUPO_ALEATORIZADO |                              | Total |
|------------|-----------------------------------|-----------------------------------|--------------------|------------------------------|-------|
|            |                                   |                                   | CONTROL            | INTERVENCION<br>ACEITE OLIVA |       |
| TABAQUISMO | nunca                             | Recuento                          | 274                | 260                          | 534   |
|            |                                   | % dentro de<br>GRUPO_ALEATORIZADO | 54,8%              | 52,0%                        | 53,4% |
|            | hasta hace 6 meses                | Recuento                          | 113                | 125                          | 238   |
|            |                                   | % dentro de<br>GRUPO_ALEATORIZADO | 22,6%              | 25,0%                        | 23,8% |
|            | hasta embarazo                    | Recuento                          | 69                 | 68                           | 137   |
|            | % dentro de<br>GRUPO_ALEATORIZADO | 13,8%                             | 13,6%              | 13,7%                        |       |
|            | fumo actualmente                  | Recuento                          | 40                 | 43                           | 83    |
|            | % dentro de<br>GRUPO_ALEATORIZADO | 8,0%                              | 8,6%               | 8,3%                         |       |
|            | desconoce                         | Recuento                          | 4                  | 4                            | 8     |
|            | % dentro de<br>GRUPO_ALEATORIZADO | ,8%                               | ,8%                | ,8%                          |       |
| Total      | Recuento                          | 500                               | 500                | 1000                         |       |
|            | % dentro de<br>GRUPO_ALEATORIZADO | 100,0%                            | 100,0%             | 100,0%                       |       |

Tabla de contingencia COMPUTE PREG\_EXERCISE\_SCORE = PasearpreG + PisosescaleraspreG + DeportepreG \*

GRUPO\_ALEATORIZADO

|                       |       |                    | GRUPO_ALEATORIZADO |                              | Total  |
|-----------------------|-------|--------------------|--------------------|------------------------------|--------|
|                       |       |                    | CONTROL            | INTERVENCION<br>ACEITE OLIVA |        |
| COMPUTE               | -3,00 | Recuento           | 133                | 149                          | 282    |
| PREG_EXERCISE_SCORE = |       | % dentro de        | 26,6%              | 29,8%                        | 28,2%  |
| PasearpreG +          |       | GRUPO_ALEATORIZADO |                    |                              |        |
| PisosescaleraspreG +  | -2,00 | Recuento           | 180                | 203                          | 383    |
| DeportepreG           |       | % dentro de        | 36,0%              | 40,6%                        | 38,3%  |
|                       |       | GRUPO_ALEATORIZADO |                    |                              |        |
|                       | -1,00 | Recuento           | 126                | 101                          | 227    |
|                       |       | % dentro de        | 25,2%              | 20,2%                        | 22,7%  |
|                       |       | GRUPO_ALEATORIZADO |                    |                              |        |
|                       | ,00   | Recuento           | 49                 | 38                           | 87     |
|                       |       | % dentro de        | 9,8%               | 7,6%                         | 8,7%   |
|                       |       | GRUPO_ALEATORIZADO |                    |                              |        |
|                       | 1,00  | Recuento           | 11                 | 8                            | 19     |
|                       |       | % dentro de        | 2,2%               | 1,6%                         | 1,9%   |
|                       |       | GRUPO_ALEATORIZADO |                    |                              |        |
|                       | 2,00  | Recuento           | 1                  | 1                            | 2      |
|                       |       | % dentro de        | ,2%                | ,2%                          | ,2%    |
|                       |       | GRUPO_ALEATORIZADO |                    |                              |        |
| Total                 |       | Recuento           | 500                | 500                          | 1000   |
|                       |       | % dentro de        | 100,0%             | 100,0%                       | 100,0% |
|                       |       | GRUPO_ALEATORIZADO |                    |                              |        |

```
T-TEST GROUPS=GRUPO_ALEATORIZADO(1 2)
/MISSING=ANALYSIS
/VARIABLES=GLUCOSABASAL75G GLUCOSA60 GLUCOSA120 HbA1_24SG HOMAIR_SG24 TAD_SG24 TAS_SG24 TAD_SG36 TAS_SG36 GLUCOSA_SG36 HbA1_SG36 HOMAIR_SG36
GANACIA_DE_PESOSG12TO24 GANACIA_DE_PESOSG12TO36 SG_PARTO PESOGR_RN TALLACM_RN PHCORDON APGAR_1MIN APGAR_5MIN
/CRITERIA=CI(.95).
```

Prueba T

**Notas**

|                                     |                                      |                                                                                                                                                                                                                                                                                                                                                                          |
|-------------------------------------|--------------------------------------|--------------------------------------------------------------------------------------------------------------------------------------------------------------------------------------------------------------------------------------------------------------------------------------------------------------------------------------------------------------------------|
| Resultados creados                  |                                      | 02-sep-2017 09:35:48                                                                                                                                                                                                                                                                                                                                                     |
| Comentarios                         |                                      |                                                                                                                                                                                                                                                                                                                                                                          |
| Entrada                             | Datos                                | C:\Users\acall\Desktop\Repositorio\FIS<br>NOVIEMBRE 2016 repositorio.sav                                                                                                                                                                                                                                                                                                 |
|                                     | Conjunto de datos activo             | Conjunto_de_datos1                                                                                                                                                                                                                                                                                                                                                       |
|                                     | Filtro                               | DIABETESGESTACIONAL <= 2 (FILTER)                                                                                                                                                                                                                                                                                                                                        |
|                                     | Peso                                 | <ninguno>                                                                                                                                                                                                                                                                                                                                                                |
|                                     | Segmentar archivo                    | <ninguno>                                                                                                                                                                                                                                                                                                                                                                |
|                                     | Núm. de filas del archivo de trabajo | 874                                                                                                                                                                                                                                                                                                                                                                      |
| Tratamiento de los valores perdidos | Definición de los perdidos           | Los valores perdidos definidos por el usuario serán tratados como perdidos.                                                                                                                                                                                                                                                                                              |
|                                     | Casos utilizados                     | Los estadísticos de cada análisis se basan en los casos que no tienen datos perdidos ni quedan fuera de rango en cualquiera de las variables del análisis.                                                                                                                                                                                                               |
| Sintaxis                            |                                      | T-TEST<br>GROUPS=GRUPO_ALEATORIZADO(1 2)<br>/MISSING=ANALYSIS<br>/VARIABLES=GLUCOSABASAL75G<br>GLUCOSA60 GLUCOSA120 HbA1_24SG<br>HOMAIR_SG24 TAD_SG24 TAS_SG24<br>TAD_SG36 TAS_SG36 GLUCOSA_SG36<br>HbA1_SG36 HOMAIR_SG36<br>GANACIA_DE_PESOSG12TO24<br>GANACIA_DE_PESOSG12TO36<br>SG_PARTO PESOGR_RN TALLACM_RN<br>PHCORDON APGAR_1MIN APGAR_5MIN<br>/CRITERIA=CI(.95). |
| Recursos                            | Tiempo de procesador                 | 00 00:00:00,047                                                                                                                                                                                                                                                                                                                                                          |
|                                     | Tiempo transcurrido                  | 00 00:00:00,047                                                                                                                                                                                                                                                                                                                                                          |

[Conjunto\_de\_datos1] C:\Users\acall\Desktop\Repositorio\FIS NOVIEMBRE 2016 repositorio.sav

**Estadísticos de grupo**

| GRUPO_ALEATORIZADO        | N                   | Media | Desviación típ. | Error típ. de la media |        |
|---------------------------|---------------------|-------|-----------------|------------------------|--------|
| SOG 75 G                  | CONTROL             | 440   | 85,69           | 6,617                  | ,315   |
|                           | INTERVENCION ACEITE | 434   | 84,13           | 6,520                  | ,313   |
|                           | OLIVA               |       |                 |                        |        |
| GLUCOSA60                 | CONTROL             | 397   | 123,77          | 31,984                 | 1,605  |
|                           | INTERVENCION ACEITE | 408   | 123,52          | 30,208                 | 1,496  |
|                           | OLIVA               |       |                 |                        |        |
| GLUCOSA120                | CONTROL             | 396   | 109,93          | 26,326                 | 1,323  |
|                           | INTERVENCION ACEITE | 407   | 106,33          | 23,779                 | 1,179  |
|                           | OLIVA               |       |                 |                        |        |
| SOG 75 G                  | CONTROL             | 430   | 5,036           | ,2930                  | ,0141  |
|                           | INTERVENCION ACEITE | 425   | 4,934           | ,3037                  | ,0147  |
|                           | OLIVA               |       |                 |                        |        |
| HOMAIR_SG24               | CONTROL             | 438   | 2,238           | 1,2456                 | ,0595  |
|                           | INTERVENCION ACEITE | 431   | 2,014           | 1,9320                 | ,0931  |
|                           | OLIVA               |       |                 |                        |        |
| TAD_SG24                  | CONTROL             | 357   | 104,66          | 11,001                 | ,582   |
|                           | INTERVENCION ACEITE | 422   | 105,71          | 11,101                 | ,540   |
|                           | OLIVA               |       |                 |                        |        |
| TAS_SG24                  | CONTROL             | 357   | 63,40           | 9,130                  | ,483   |
|                           | INTERVENCION ACEITE | 422   | 63,55           | 8,511                  | ,414   |
|                           | OLIVA               |       |                 |                        |        |
| TAD_SG36                  | CONTROL             | 183   | 111,60          | 13,198                 | ,976   |
|                           | INTERVENCION ACEITE | 299   | 112,78          | 11,514                 | ,666   |
|                           | OLIVA               |       |                 |                        |        |
| TAS_SG36                  | CONTROL             | 183   | 72,31           | 8,471                  | ,626   |
|                           | INTERVENCION ACEITE | 299   | 73,41           | 9,254                  | ,535   |
|                           | OLIVA               |       |                 |                        |        |
| GLUCOSA_SG36              | CONTROL             | 191   | 77,09           | 7,352                  | ,532   |
|                           | INTERVENCION ACEITE | 314   | 74,99           | 7,767                  | ,438   |
|                           | OLIVA               |       |                 |                        |        |
| HbA1_SG36                 | CONTROL             | 189   | 5,322           | ,3366                  | ,0245  |
|                           | INTERVENCION ACEITE | 307   | 5,203           | ,3331                  | ,0190  |
|                           | OLIVA               |       |                 |                        |        |
| HOMAIR_SG36               | CONTROL             | 179   | 2,211           | 2,6955                 | ,2015  |
|                           | INTERVENCION ACEITE | 295   | 2,096           | 2,3635                 | ,1376  |
|                           | OLIVA               |       |                 |                        |        |
| COMPUTE                   | CONTROL             | 409   | 5,5797          | 2,79643                | ,13827 |
| GANACIA_DE_PESOSG12TO2    | INTERVENCION ACEITE | 415   | 5,2166          | 2,54398                | ,12488 |
| 4 = PESO_SG24 - PESO_SG12 | OLIVA               |       |                 |                        |        |

|                                                     |                              |     |           |           |          |
|-----------------------------------------------------|------------------------------|-----|-----------|-----------|----------|
| IF (PESO_SG36 > 10)                                 | CONTROL                      | 231 | 9,3645    | 4,32127   | ,28432   |
| GANACIA_DE_PESOSG12TO3<br>6 = PESO_SG36 - PESO_SG12 | INTERVENCION ACEITE<br>OLIVA | 311 | 9,9900    | 4,74947   | ,26932   |
| SG_PARTO                                            | CONTROL                      | 364 | 39,5825   | 1,36317   | ,07145   |
|                                                     | INTERVENCION ACEITE<br>OLIVA | 303 | 39,6368   | 1,25219   | ,07194   |
| Peso RN en gramos                                   | CONTROL                      | 364 | 3215,8654 | 480,00397 | 25,15904 |
|                                                     | INTERVENCION ACEITE<br>OLIVA | 305 | 3250,6689 | 391,80922 | 22,43493 |
| TALLACM_RN                                          | CONTROL                      | 336 | 49,0571   | 2,75103   | ,15008   |
|                                                     | INTERVENCION ACEITE<br>OLIVA | 284 | 49,2085   | 2,06844   | ,12274   |
| PHCORDON                                            | CONTROL                      | 348 | 7,2796    | ,16265    | ,00872   |
|                                                     | INTERVENCION ACEITE<br>OLIVA | 285 | 7,2758    | ,07646    | ,00453   |
| APGAR_1MIN                                          | CONTROL                      | 356 | 8,81      | ,752      | ,040     |
|                                                     | INTERVENCION ACEITE<br>OLIVA | 296 | 8,83      | ,706      | ,041     |
| APGAR_5MIN                                          | CONTROL                      | 357 | 10,02     | 3,208     | ,170     |
|                                                     | INTERVENCION ACEITE<br>OLIVA | 296 | 10,06     | 3,516     | ,204     |

**Prueba de muestras independientes**

|            |                                     | Prueba de Levene para la igualdad de varianzas |      | Prueba T para la igualdad de medias |         |                  |                      |                             |                                               |          |
|------------|-------------------------------------|------------------------------------------------|------|-------------------------------------|---------|------------------|----------------------|-----------------------------|-----------------------------------------------|----------|
|            |                                     | F                                              | Sig. | t                                   | gl      | Sig. (bilateral) | Diferencia de medias | Error típ. de la diferencia | 95% Intervalo de confianza para la diferencia |          |
|            |                                     |                                                |      |                                     |         |                  |                      |                             | Inferior                                      | Superior |
| SOG 75 G   | Se han asumido varianzas iguales    | 1,559                                          | ,212 | 3,504                               | 872     | ,000             | 1,557                | ,444                        | ,685                                          | 2,430    |
|            | No se han asumido varianzas iguales |                                                |      | 3,504                               | 871,999 | ,000             | 1,557                | ,444                        | ,685                                          | 2,429    |
| GLUCOSA60  | Se han asumido varianzas iguales    | 1,618                                          | ,204 | ,111                                | 803     | ,911             | ,244                 | 2,192                       | -4,059                                        | 4,547    |
|            | No se han asumido varianzas iguales |                                                |      | ,111                                | 797,320 | ,912             | ,244                 | 2,194                       | -4,063                                        | 4,550    |
| GLUCOSA120 | Se han asumido varianzas iguales    | 3,092                                          | ,079 | 2,033                               | 801     | ,042             | 3,598                | 1,769                       | ,124                                          | 7,071    |
|            | No se han asumido varianzas iguales |                                                |      | 2,030                               | 787,948 | ,043             | 3,598                | 1,772                       | ,119                                          | 7,076    |



|                                           |                                     |       |      |        |         |      |         |        |          |        |
|-------------------------------------------|-------------------------------------|-------|------|--------|---------|------|---------|--------|----------|--------|
| SOG 75 G                                  | Se han asumido varianzas iguales    | ,612  | ,434 | 4,984  | 853     | ,000 | ,1017   | ,0204  | ,0617    | ,1418  |
|                                           | No se han asumido varianzas iguales |       |      | 4,983  | 851,065 | ,000 | ,1017   | ,0204  | ,0617    | ,1418  |
| HOMAIR_SG24                               | Se han asumido varianzas iguales    | 2,160 | ,142 | 2,031  | 867     | ,043 | ,2237   | ,1101  | ,0076    | ,4397  |
|                                           | No se han asumido varianzas iguales |       |      | 2,025  | 733,043 | ,043 | ,2237   | ,1105  | ,0068    | ,4405  |
| TAD_SG24                                  | Se han asumido varianzas iguales    | ,253  | ,615 | -1,314 | 777     | ,189 | -1,045  | ,795   | -2,605   | ,516   |
|                                           | No se han asumido varianzas iguales |       |      | -1,315 | 757,927 | ,189 | -1,045  | ,794   | -2,604   | ,515   |
| TAS_SG24                                  | Se han asumido varianzas iguales    | ,964  | ,326 | -,228  | 777     | ,819 | -,144   | ,633   | -1,387   | 1,098  |
|                                           | No se han asumido varianzas iguales |       |      | -,227  | 735,626 | ,821 | -,144   | ,636   | -1,394   | 1,105  |
| TAD_SG36                                  | Se han asumido varianzas iguales    | 1,050 | ,306 | -1,038 | 480     | ,300 | -1,187  | 1,143  | -3,433   | 1,059  |
|                                           | No se han asumido varianzas iguales |       |      | -1,005 | 345,308 | ,316 | -1,187  | 1,181  | -3,510   | 1,136  |
| TAS_SG36                                  | Se han asumido varianzas iguales    | 1,365 | ,243 | -1,303 | 480     | ,193 | -1,097  | ,841   | -2,750   | ,557   |
|                                           | No se han asumido varianzas iguales |       |      | -1,331 | 411,028 | ,184 | -1,097  | ,824   | -2,716   | ,523   |
| GLUCOSA_SG36                              | Se han asumido varianzas iguales    | ,176  | ,675 | 3,007  | 503     | ,003 | 2,101   | ,699   | ,728     | 3,473  |
|                                           | No se han asumido varianzas iguales |       |      | 3,048  | 418,446 | ,002 | 2,101   | ,689   | ,746     | 3,455  |
| HbA1_SG36                                 | Se han asumido varianzas iguales    | ,063  | ,802 | 3,827  | 494     | ,000 | ,1183   | ,0309  | ,0576    | ,1791  |
|                                           | No se han asumido varianzas iguales |       |      | 3,817  | 394,860 | ,000 | ,1183   | ,0310  | ,0574    | ,1793  |
| HOMAIR_SG36                               | Se han asumido varianzas iguales    | ,373  | ,542 | ,487   | 472     | ,627 | ,1150   | ,2363  | -,3493   | ,5793  |
|                                           | No se han asumido varianzas iguales |       |      | ,471   | 338,254 | ,638 | ,1150   | ,2440  | -,3649   | ,5949  |
| COMPUTE GANACIA_DE_PESOSG12TO             | Se han asumido varianzas iguales    | 5,102 | ,024 | 1,950  | 822     | ,052 | ,36308  | ,18619 | -,00238  | ,72854 |
| 24 = PESO_SG24 - PESO_SG12                | No se han asumido varianzas iguales |       |      | 1,949  | 812,375 | ,052 | ,36308  | ,18632 | -,00264  | ,72880 |
| IF (PESO_SG36 > 10) GANACIA_DE_PESOSG12TO | Se han asumido varianzas iguales    | ,001  | ,981 | -1,575 | 540     | ,116 | -,62553 | ,39712 | -1,40562 | ,15455 |

|                               |                                        |       |      |        |         |      |           |          |            |          |
|-------------------------------|----------------------------------------|-------|------|--------|---------|------|-----------|----------|------------|----------|
| 36 = PESO_SG36 -<br>PESO_SG12 | No se han asumido varianzas<br>iguales |       |      | -1,597 | 518,312 | ,111 | -,62553   | ,39162   | -1,39490   | ,14383   |
| SG_PARTO                      | Se han asumido varianzas<br>iguales    | 1,005 | ,317 | -,531  | 665     | ,596 | -,05427   | ,10218   | -,25490    | ,14637   |
|                               | No se han asumido varianzas<br>iguales |       |      | -,535  | 658,554 | ,593 | -,05427   | ,10139   | -,25335    | ,14482   |
| Peso RN en gramos             | Se han asumido varianzas<br>iguales    | 5,575 | ,019 | -1,014 | 667     | ,311 | -34,80347 | 34,31074 | -102,17352 | 32,56659 |
|                               | No se han asumido varianzas<br>iguales |       |      | -1,032 | 666,558 | ,302 | -34,80347 | 33,70910 | -100,99228 | 31,38534 |
| TALLACM_RN                    | Se han asumido varianzas<br>iguales    | ,510  | ,476 | -,762  | 618     | ,446 | -,15131   | ,19846   | -,54104    | ,23842   |
|                               | No se han asumido varianzas<br>iguales |       |      | -,780  | 609,974 | ,435 | -,15131   | ,19388   | -,53206    | ,22944   |
| PHCORDON                      | Se han asumido varianzas<br>iguales    | ,305  | ,581 | ,367   | 631     | ,714 | ,00384    | ,01047   | -,01672    | ,02441   |
|                               | No se han asumido varianzas<br>iguales |       |      | ,391   | 513,823 | ,696 | ,00384    | ,00983   | -,01546    | ,02315   |
| APGAR_1MIN                    | Se han asumido varianzas<br>iguales    | ,211  | ,646 | -,443  | 650     | ,658 | -,025     | ,058     | -,138      | ,088     |
|                               | No se han asumido varianzas<br>iguales |       |      | -,445  | 640,647 | ,656 | -,025     | ,057     | -,138      | ,087     |
| APGAR_5MIN                    | Se han asumido varianzas<br>iguales    | ,069  | ,792 | -,180  | 651     | ,857 | -,047     | ,263     | -,565      | ,470     |
|                               | No se han asumido varianzas<br>iguales |       |      | -,178  | 604,207 | ,859 | -,047     | ,266     | -,569      | ,474     |

```

USE ALL.
COMPUTE filter_$=(DIABETESGESTACIONAL = 1).
VARIABLE LABELS filter_$ 'DIABETESGESTACIONAL = 1 (FILTER)'.
VALUE LABELS filter_$ 0 'Not Selected' 1 'Selected'.
FORMATS filter_$ (f1.0).
FILTER BY filter_$.
EXECUTE.
CROSSTABS
  /TABLES=TTOFINAL_INSULINAvsNUTRICION BY GRUPO_ALEATORIZADO
  /FORMAT=AVALUE TABLES
  /STATISTICS=CHISQ
  /CELLS=COUNT COLUMN
  /COUNT ROUND CELL.

```

## Tablas de contingencia

**Notas**

|                                     |                                      |                                                                                                                                                                        |
|-------------------------------------|--------------------------------------|------------------------------------------------------------------------------------------------------------------------------------------------------------------------|
| Resultados creados                  |                                      | 02-sep-2017 09:39:56                                                                                                                                                   |
| Comentarios                         |                                      |                                                                                                                                                                        |
| Entrada                             | Datos                                | C:\Users\acall\Desktop\Repositorio\FIS<br>NOVIEMBRE 2016 repositorio.sav                                                                                               |
|                                     | Conjunto de datos activo             | Conjunto_de_datos1                                                                                                                                                     |
|                                     | Filtro                               | DIABETESGESTACIONAL = 1 (FILTER)                                                                                                                                       |
|                                     | Peso                                 | <ninguno>                                                                                                                                                              |
|                                     | Segmentar archivo                    | <ninguno>                                                                                                                                                              |
|                                     | Núm. de filas del archivo de trabajo | 177                                                                                                                                                                    |
| Tratamiento de los valores perdidos | Definición de los perdidos           | Los valores perdidos definidos por el usuario serán tratados como perdidos.                                                                                            |
|                                     | Casos utilizados                     | Los estadísticos de las tablas se basan en todos los casos con datos válidos en los rangos especificados para todas las variables de las tablas.                       |
| Sintaxis                            |                                      | CROSSTABS<br><br>/TABLES=TTOFINAL_INSULINAvsNUTRICION BY GRUPO_ALEATORIZADO<br>/FORMAT=AVALUE TABLES<br>/STATISTICS=CHISQ<br>/CELLS=COUNT COLUMN<br>/COUNT ROUND CELL. |
| Recursos                            | Tiempo de procesador                 | 00 00:00:00,016                                                                                                                                                        |
|                                     | Tiempo transcurrido                  | 00 00:00:00,016                                                                                                                                                        |
|                                     | Dimensiones solicitadas              | 2                                                                                                                                                                      |
|                                     | Casillas disponibles                 | 174762                                                                                                                                                                 |

[Conjunto\_de\_datos1] C:\Users\acall\Desktop\Repositorio\FIS NOVIEMBRE 2016 repositorio.sav

**Resumen del procesamiento de los casos**

|  |         |          |       |
|--|---------|----------|-------|
|  | Casos   |          |       |
|  | Válidos | Perdidos | Total |

|                                                      | N   | Porcentaje | N | Porcentaje | N   | Porcentaje |
|------------------------------------------------------|-----|------------|---|------------|-----|------------|
| TTOFINAL_INSULINAvsNUTRICION *<br>GRUPO_ALEATORIZADO | 177 | 100,0%     | 0 | ,0%        | 177 | 100,0%     |

**Tabla de contingencia TTOFINAL\_INSULINAvsNUTRICION \* GRUPO\_ALEATORIZADO**

|                              |      |                                   | GRUPO_ALEATORIZADO |                              | Total  |
|------------------------------|------|-----------------------------------|--------------------|------------------------------|--------|
|                              |      |                                   | CONTROL            | INTERVENCION<br>ACEITE OLIVA |        |
| TTOFINAL_INSULINAvsNUTRICION | 1,00 | Recuento                          | 33                 | 14                           | 47     |
|                              |      | % dentro de<br>GRUPO_ALEATORIZADO | 32,0%              | 18,9%                        | 26,6%  |
|                              | 2,00 | Recuento                          | 70                 | 60                           | 130    |
|                              |      | % dentro de<br>GRUPO_ALEATORIZADO | 68,0%              | 81,1%                        | 73,4%  |
| Total                        |      | Recuento                          | 103                | 74                           | 177    |
|                              |      | % dentro de<br>GRUPO_ALEATORIZADO | 100,0%             | 100,0%                       | 100,0% |

**Pruebas de chi-cuadrado**

|                                         | Valor              | gl | Sig. asintótica<br>(bilateral) | Sig. exacta<br>(bilateral) | Sig. exacta<br>(unilateral) |
|-----------------------------------------|--------------------|----|--------------------------------|----------------------------|-----------------------------|
| Chi-cuadrado de Pearson                 | 3,801 <sup>a</sup> | 1  | ,051                           |                            |                             |
| Corrección por continuidad <sup>b</sup> | 3,158              | 1  | ,076                           |                            |                             |
| Razón de verosimilitudes                | 3,902              | 1  | ,048                           |                            |                             |
| Estadístico exacto de Fisher            |                    |    |                                | ,059                       | ,037                        |
| Asociación lineal por lineal            | 3,779              | 1  | ,052                           |                            |                             |
| N de casos válidos                      | 177                |    |                                |                            |                             |

a. 0 casillas (,0%) tienen una frecuencia esperada inferior a 5. La frecuencia mínima esperada es 19,65.

b. Calculado sólo para una tabla de 2x2.

```
USE ALL.
COMPUTE filter_$=(DIABETESGESTACIONAL = 2).
VARIABLE LABELS filter_$ 'DIABETESGESTACIONAL = 2 (FILTER)'.
VALUE LABELS filter_$ 0 'Not Selected' 1 'Selected'.
FORMATS filter_$ (f1.0).
FILTER BY filter_$.
EXECUTE.
CROSSTABS
```

```

/TABLES=DIABETESGESTACIONAL GESTACIONAL_HTAYESvsNO HTA_EMBARAZO_PREECLAMPSIA PROTEINURIA UTIYesVSNo PARTO_NUMERICA EMERGENCY_CESAREAN_SECTION
PERINEALTRAUMAYESvsNO DAÑO_PLEXOBRAQUIAL PREMATURIDAD LGA_MACROSMICOS SGA HIPOGLUCEMIA DISTRES_RESPIRATORIO
HPERBILIRRUNEMIA_YES_VS_NO NICU_OBSERVATION_STANCE BY GRUPO_ALEATORIZADO
/FORMAT=AVALUE TABLES
/STATISTICS=CHISQ
/CELLS=COUNT COLUMN
/COUNT ROUND CELL.

```

## Tablas de contingencia

| Notas                               |                                      |                                                                                                                                                  |
|-------------------------------------|--------------------------------------|--------------------------------------------------------------------------------------------------------------------------------------------------|
| Resultados creados                  |                                      | 02-sep-2017 10:28:59                                                                                                                             |
| Comentarios                         |                                      |                                                                                                                                                  |
| Entrada                             | Datos                                | C:\Users\acall\Desktop\Repositorio\FIS<br>NOVIEMBRE 2016 repositorio.sav                                                                         |
|                                     | Conjunto de datos activo             | Conjunto_de_datos1                                                                                                                               |
|                                     | Filtro                               | DIABETESGESTACIONAL <= 2 (FILTER)                                                                                                                |
|                                     | Peso                                 | <ninguno>                                                                                                                                        |
|                                     | Segmentar archivo                    | <ninguno>                                                                                                                                        |
|                                     | Núm. de filas del archivo de trabajo | 874                                                                                                                                              |
| Tratamiento de los valores perdidos | Definición de los perdidos           | Los valores perdidos definidos por el usuario serán tratados como perdidos.                                                                      |
|                                     | Casos utilizados                     | Los estadísticos de las tablas se basan en todos los casos con datos válidos en los rangos especificados para todas las variables de las tablas. |

|          |                                                                                                                                                                                                                                                                                                                                                                                                                                                                                    |  |                 |
|----------|------------------------------------------------------------------------------------------------------------------------------------------------------------------------------------------------------------------------------------------------------------------------------------------------------------------------------------------------------------------------------------------------------------------------------------------------------------------------------------|--|-----------------|
| Sintaxis | CROSSTABS<br>/TABLES=DIABETESGESTACIONAL<br>GESTACIONAL_HTAYESvsNO<br>HTA_EMBARAZO_PREECLAMPSIA<br>PROTEINURIA_UTIYesVSNo<br>PARTO_NUMERICA<br>EMERGENCY_CESAREAN_SECTION<br>PERINEALTRAUMAYESvsNO<br>DAÑO_PLEXOBRAQUIAL<br>PREMATURIDAD LGA_MACROSOMICOS<br>SGA HIPOGLUCEMIA<br>DISTRES_RESPIRATORIO<br>HPERBILIRRUNEMIA_YES_VS_NO<br>NICU_OBSERVATION_STANCE BY<br>GRUPO_ALEATORIZADO<br>/FORMAT=AVALUE TABLES<br>/STATISTICS=CHISQ<br>/CELLS=COUNT COLUMN<br>/COUNT ROUND CELL. |  |                 |
| Recursos | Tiempo de procesador                                                                                                                                                                                                                                                                                                                                                                                                                                                               |  | 00 00:00:00,032 |
|          | Tiempo transcurrido                                                                                                                                                                                                                                                                                                                                                                                                                                                                |  | 00 00:00:00,028 |
|          | Dimensiones solicitadas                                                                                                                                                                                                                                                                                                                                                                                                                                                            |  | 2               |
|          | Casillas disponibles                                                                                                                                                                                                                                                                                                                                                                                                                                                               |  | 174762          |

[Conjunto\_de\_datos1] C:\Users\acall\Desktop\Repositorio\FIS NOVIEMBRE 2016 repositorio.sav

**Resumen del procesamiento de los casos**

|                             | Casos   |            |          |            |       |            |
|-----------------------------|---------|------------|----------|------------|-------|------------|
|                             | Válidos |            | Perdidos |            | Total |            |
|                             | N       | Porcentaje | N        | Porcentaje | N     | Porcentaje |
| DIABETESGESTACIONAL *       | 874     | 100,0%     | 0        | ,0%        | 874   | 100,0%     |
| GRUPO_ALEATORIZADO          |         |            |          |            |       |            |
| GESTACIONAL_HTAYESvsNO      | 874     | 100,0%     | 0        | ,0%        | 874   | 100,0%     |
| * GRUPO_ALEATORIZADO        |         |            |          |            |       |            |
| HTA_EMBARAZO_PREECLAMPSIA * | 874     | 100,0%     | 0        | ,0%        | 874   | 100,0%     |
| GRUPO_ALEATORIZADO          |         |            |          |            |       |            |

|                                              |     |        |   |     |     |        |
|----------------------------------------------|-----|--------|---|-----|-----|--------|
| PROTEINURIA *                                | 874 | 100,0% | 0 | ,0% | 874 | 100,0% |
| GRUPO_ALEATORIZADO                           |     |        |   |     |     |        |
| UTIYesVNo *                                  | 874 | 100,0% | 0 | ,0% | 874 | 100,0% |
| GRUPO_ALEATORIZADO                           |     |        |   |     |     |        |
| PARTO_NUMERICA *                             | 874 | 100,0% | 0 | ,0% | 874 | 100,0% |
| GRUPO_ALEATORIZADO                           |     |        |   |     |     |        |
| EMERGENCY_CESAREAN_SECTION *                 | 874 | 100,0% | 0 | ,0% | 874 | 100,0% |
| GRUPO_ALEATORIZADO                           |     |        |   |     |     |        |
| PT YES VS NO *                               | 874 | 100,0% | 0 | ,0% | 874 | 100,0% |
| GRUPO_ALEATORIZADO                           |     |        |   |     |     |        |
| DAÑO_PLEXOBRAQUIAL *                         | 874 | 100,0% | 0 | ,0% | 874 | 100,0% |
| GRUPO_ALEATORIZADO                           |     |        |   |     |     |        |
| PREMATURO <37 VS >=37 *                      | 874 | 100,0% | 0 | ,0% | 874 | 100,0% |
| GRUPO_ALEATORIZADO                           |     |        |   |     |     |        |
| LGA> 90 PERCENTILE *                         | 874 | 100,0% | 0 | ,0% | 874 | 100,0% |
| GRUPO_ALEATORIZADO                           |     |        |   |     |     |        |
| SGA < 10 PERCENTILE *                        | 874 | 100,0% | 0 | ,0% | 874 | 100,0% |
| GRUPO_ALEATORIZADO                           |     |        |   |     |     |        |
| HIPOGLUCEMIA *                               | 874 | 100,0% | 0 | ,0% | 874 | 100,0% |
| GRUPO_ALEATORIZADO                           |     |        |   |     |     |        |
| DISTRES_RESPIRATORIO *                       | 874 | 100,0% | 0 | ,0% | 874 | 100,0% |
| GRUPO_ALEATORIZADO                           |     |        |   |     |     |        |
| HPERBILIRRUNEMIA_YES_VS_NO *                 | 874 | 100,0% | 0 | ,0% | 874 | 100,0% |
| GRUPO_ALEATORIZADO                           |     |        |   |     |     |        |
| NICU_OBSERVATION_STANCE * GRUPO_ALEATORIZADO | 874 | 100,0% | 0 | ,0% | 874 | 100,0% |

## DIABETESGESTACIONAL \* GRUPO\_ALEATORIZADO

Tabla de contingencia

|                     |    |                                | GRUPO_ALEATORIZADO |                           | Total |
|---------------------|----|--------------------------------|--------------------|---------------------------|-------|
|                     |    |                                | CONTROL            | INTERVENCION ACEITE OLIVA |       |
| DIABETESGESTACIONAL | SI | Recuento                       | 103                | 74                        | 177   |
|                     |    | % dentro de GRUPO_ALEATORIZADO | 23,4%              | 17,1%                     | 20,3% |

|       |    |                                |        |        |        |
|-------|----|--------------------------------|--------|--------|--------|
|       | NO | Recuento                       | 337    | 360    | 697    |
|       |    | % dentro de GRUPO_ALEATORIZADO | 76,6%  | 82,9%  | 79,7%  |
| Total |    | Recuento                       | 440    | 434    | 874    |
|       |    | % dentro de GRUPO_ALEATORIZADO | 100,0% | 100,0% | 100,0% |

**Pruebas de chi-cuadrado**

|                                         | Valor              | gl | Sig. asintótica (bilateral) | Sig. exacta (bilateral) | Sig. exacta (unilateral) |
|-----------------------------------------|--------------------|----|-----------------------------|-------------------------|--------------------------|
| Chi-cuadrado de Pearson                 | 5,469 <sup>a</sup> | 1  | ,019                        |                         |                          |
| Corrección por continuidad <sup>b</sup> | 5,083              | 1  | ,024                        |                         |                          |
| Razón de verosimilitudes                | 5,491              | 1  | ,019                        |                         |                          |
| Estadístico exacto de Fisher            |                    |    |                             | ,023                    | ,012                     |
| Asociación lineal por lineal            | 5,463              | 1  | ,019                        |                         |                          |
| N de casos válidos                      | 874                |    |                             |                         |                          |

a. 0 casillas (,0%) tienen una frecuencia esperada inferior a 5. La frecuencia mínima esperada es 87,89.

b. Calculado sólo para una tabla de 2x2.

**GESTACIONAL\_HTAYESvsNO \* GRUPO\_ALEATORIZADO**

**Tabla de contingencia**

|                        |      |                                | GRUPO_ALEATORIZADO |                           | Total  |
|------------------------|------|--------------------------------|--------------------|---------------------------|--------|
|                        |      |                                | CONTROL            | INTERVENCION ACEITE OLIVA |        |
| GESTACIONAL_HTAYESvsNO | 1,00 | Recuento                       | 19                 | 13                        | 32     |
|                        |      | % dentro de GRUPO_ALEATORIZADO | 4,3%               | 3,0%                      | 3,7%   |
|                        | 2,00 | Recuento                       | 421                | 421                       | 842    |
|                        |      | % dentro de GRUPO_ALEATORIZADO | 95,7%              | 97,0%                     | 96,3%  |
| Total                  |      | Recuento                       | 440                | 434                       | 874    |
|                        |      | % dentro de GRUPO_ALEATORIZADO | 100,0%             | 100,0%                    | 100,0% |



**Pruebas de chi-cuadrado**

|                                         | Valor              | gl | Sig. asintótica<br>(bilateral) | Sig. exacta<br>(bilateral) | Sig. exacta<br>(unilateral) |
|-----------------------------------------|--------------------|----|--------------------------------|----------------------------|-----------------------------|
| Chi-cuadrado de Pearson                 | 1,084 <sup>a</sup> | 1  | ,298                           |                            |                             |
| Corrección por continuidad <sup>b</sup> | ,741               | 1  | ,389                           |                            |                             |
| Razón de verosimilitudes                | 1,090              | 1  | ,296                           |                            |                             |
| Estadístico exacto de Fisher            |                    |    |                                | ,368                       | ,195                        |
| Asociación lineal por lineal            | 1,083              | 1  | ,298                           |                            |                             |
| N de casos válidos                      | 874                |    |                                |                            |                             |

a. 0 casillas (,0%) tienen una frecuencia esperada inferior a 5. La frecuencia mínima esperada es 15,89.

b. Calculado sólo para una tabla de 2x2.

**HTA\_EMBARAZO\_PREECLAMPSIA \* GRUPO\_ALEATORIZADO**

**Tabla de contingencia**

|                           |             |                                   | GRUPO_ALEATORIZADO |                              | Total  |
|---------------------------|-------------|-----------------------------------|--------------------|------------------------------|--------|
|                           |             |                                   | CONTROL            | INTERVENCION<br>ACEITE OLIVA |        |
| HTA_EMBARAZO_PREECLAMPSIA | PREECLAMPIA | Recuento                          | 11                 | 7                            | 18     |
|                           |             | % dentro de<br>GRUPO_ALEATORIZADO | 2,5%               | 1,6%                         | 2,1%   |
|                           | NO          | Recuento                          | 429                | 427                          | 856    |
|                           |             | % dentro de<br>GRUPO_ALEATORIZADO | 97,5%              | 98,4%                        | 97,9%  |
| Total                     |             | Recuento                          | 440                | 434                          | 874    |
|                           |             | % dentro de<br>GRUPO_ALEATORIZADO | 100,0%             | 100,0%                       | 100,0% |

**Pruebas de chi-cuadrado**

|                         | Valor             | gl | Sig. asintótica<br>(bilateral) | Sig. exacta<br>(bilateral) | Sig. exacta<br>(unilateral) |
|-------------------------|-------------------|----|--------------------------------|----------------------------|-----------------------------|
| Chi-cuadrado de Pearson | ,852 <sup>a</sup> | 1  | ,356                           |                            |                             |

|                                         |      |   |      |      |      |
|-----------------------------------------|------|---|------|------|------|
| Corrección por continuidad <sup>b</sup> | ,469 | 1 | ,493 |      |      |
| Razón de verosimilitudes                | ,860 | 1 | ,354 |      |      |
| Estadístico exacto de Fisher            |      |   |      | ,476 | ,247 |
| Asociación lineal por lineal            | ,851 | 1 | ,356 |      |      |
| N de casos válidos                      | 874  |   |      |      |      |

a. 0 casillas (,0%) tienen una frecuencia esperada inferior a 5. La frecuencia mínima esperada es 8,94.

b. Calculado sólo para una tabla de 2x2.

## PROTEINURIA \* GRUPO\_ALEATORIZADO

Tabla de contingencia

|             |    |                                   | GRUPO_ALEATORIZADO |                              | Total  |
|-------------|----|-----------------------------------|--------------------|------------------------------|--------|
|             |    |                                   | CONTROL            | INTERVENCION<br>ACEITE OLIVA |        |
| PROTEINURIA | SI | Recuento                          | 6                  | 2                            | 8      |
|             |    | % dentro de<br>GRUPO_ALEATORIZADO | 1,4%               | ,5%                          | ,9%    |
|             | NO | Recuento                          | 434                | 432                          | 866    |
|             |    | % dentro de<br>GRUPO_ALEATORIZADO | 98,6%              | 99,5%                        | 99,1%  |
| Total       |    | Recuento                          | 440                | 434                          | 874    |
|             |    | % dentro de<br>GRUPO_ALEATORIZADO | 100,0%             | 100,0%                       | 100,0% |

Pruebas de chi-cuadrado

|                                         | Valor              | gl | Sig. asintótica<br>(bilateral) | Sig. exacta<br>(bilateral) | Sig. exacta<br>(unilateral) |
|-----------------------------------------|--------------------|----|--------------------------------|----------------------------|-----------------------------|
| Chi-cuadrado de Pearson                 | 1,964 <sup>a</sup> | 1  | ,161                           |                            |                             |
| Corrección por continuidad <sup>b</sup> | 1,094              | 1  | ,296                           |                            |                             |
| Razón de verosimilitudes                | 2,056              | 1  | ,152                           |                            |                             |
| Estadístico exacto de Fisher            |                    |    |                                | ,287                       | ,148                        |
| Asociación lineal por lineal            | 1,961              | 1  | ,161                           |                            |                             |
| N de casos válidos                      | 874                |    |                                |                            |                             |

**Pruebas de chi-cuadrado**

|                                         | Valor              | gl | Sig. asintótica<br>(bilateral) | Sig. exacta<br>(bilateral) | Sig. exacta<br>(unilateral) |
|-----------------------------------------|--------------------|----|--------------------------------|----------------------------|-----------------------------|
| Chi-cuadrado de Pearson                 | 1,964 <sup>a</sup> | 1  | ,161                           |                            |                             |
| Corrección por continuidad <sup>b</sup> | 1,094              | 1  | ,296                           |                            |                             |
| Razón de verosimilitudes                | 2,056              | 1  | ,152                           |                            |                             |
| Estadístico exacto de Fisher            |                    |    |                                | ,287                       | ,148                        |
| Asociación lineal por lineal            | 1,961              | 1  | ,161                           |                            |                             |
| N de casos válidos                      | 874                |    |                                |                            |                             |

a. 2 casillas (50,0%) tienen una frecuencia esperada inferior a 5. La frecuencia mínima esperada es 3,97.

b. Calculado sólo para una tabla de 2x2.

**UTIYesVSNo \* GRUPO\_ALEATORIZADO**

**Tabla de contingencia**

|            |      |                                   | GRUPO_ALEATORIZADO |                              | Total  |
|------------|------|-----------------------------------|--------------------|------------------------------|--------|
|            |      |                                   | CONTROL            | INTERVENCION<br>ACEITE OLIVA |        |
| UTIYesVSNo | 1,00 | Recuento                          | 60                 | 24                           | 84     |
|            |      | % dentro de<br>GRUPO_ALEATORIZADO | 13,6%              | 5,5%                         | 9,6%   |
|            | 2,00 | Recuento                          | 380                | 410                          | 790    |
|            |      | % dentro de<br>GRUPO_ALEATORIZADO | 86,4%              | 94,5%                        | 90,4%  |
| Total      |      | Recuento                          | 440                | 434                          | 874    |
|            |      | % dentro de<br>GRUPO_ALEATORIZADO | 100,0%             | 100,0%                       | 100,0% |

**Pruebas de chi-cuadrado**

|                                         | Valor               | gl | Sig. asintótica<br>(bilateral) | Sig. exacta<br>(bilateral) | Sig. exacta<br>(unilateral) |
|-----------------------------------------|---------------------|----|--------------------------------|----------------------------|-----------------------------|
| Chi-cuadrado de Pearson                 | 16,527 <sup>a</sup> | 1  | ,000                           |                            |                             |
| Corrección por continuidad <sup>b</sup> | 15,607              | 1  | ,000                           |                            |                             |
| Razón de verosimilitudes                | 17,038              | 1  | ,000                           |                            |                             |

|                              |        |   |      |      |      |
|------------------------------|--------|---|------|------|------|
| Estadístico exacto de Fisher |        |   |      | ,000 | ,000 |
| Asociación lineal por lineal | 16,508 | 1 | ,000 |      |      |
| N de casos válidos           | 874    |   |      |      |      |

- a. 0 casillas (,0%) tienen una frecuencia esperada inferior a 5. La frecuencia mínima esperada es 41,71.  
b. Calculado sólo para una tabla de 2x2.

## PARTO\_NUMERICA \* GRUPO\_ALEATORIZADO

Tabla de contingencia

|                |                                   |                                   | GRUPO_ALEATORIZADO |                              | Total  |
|----------------|-----------------------------------|-----------------------------------|--------------------|------------------------------|--------|
|                |                                   |                                   | CONTROL            | INTERVENCION<br>ACEITE OLIVA |        |
| PARTO_NUMERICA | 1,00                              | Recuento                          | 312                | 316                          | 628    |
|                |                                   | % dentro de<br>GRUPO_ALEATORIZADO | 70,9%              | 72,8%                        | 71,9%  |
|                | 2,00                              | Recuento                          | 68                 | 58                           | 126    |
|                | % dentro de<br>GRUPO_ALEATORIZADO | 15,5%                             | 13,4%              | 14,4%                        |        |
|                | 3,00                              | Recuento                          | 60                 | 60                           | 120    |
|                | % dentro de<br>GRUPO_ALEATORIZADO | 13,6%                             | 13,8%              | 13,7%                        |        |
| Total          |                                   | Recuento                          | 440                | 434                          | 874    |
|                |                                   | % dentro de<br>GRUPO_ALEATORIZADO | 100,0%             | 100,0%                       | 100,0% |

Pruebas de chi-cuadrado

|                              | Valor             | gl | Sig. asintótica<br>(bilateral) |
|------------------------------|-------------------|----|--------------------------------|
| Chi-cuadrado de Pearson      | ,778 <sup>a</sup> | 2  | ,678                           |
| Razón de verosimilitudes     | ,779              | 2  | ,677                           |
| Asociación lineal por lineal | ,124              | 1  | ,725                           |
| N de casos válidos           | 874               |    |                                |

**Pruebas de chi-cuadrado**

|                              | Valor             | gl | Sig. asintótica<br>(bilateral) |
|------------------------------|-------------------|----|--------------------------------|
| Chi-cuadrado de Pearson      | ,778 <sup>a</sup> | 2  | ,678                           |
| Razón de verosimilitudes     | ,779              | 2  | ,677                           |
| Asociación lineal por lineal | ,124              | 1  | ,725                           |
| N de casos válidos           | 874               |    |                                |

a. 0 casillas (.0%) tienen una frecuencia esperada inferior a 5. La frecuencia mínima esperada es 59,59.

**EMERGENCY\_CESAREAN\_SECTION \* GRUPO\_ALEATORIZADO**

**Tabla de contingencia**

|                            |      |                                   | GRUPO_ALEATORIZADO |                              | Total  |
|----------------------------|------|-----------------------------------|--------------------|------------------------------|--------|
|                            |      |                                   | CONTROL            | INTERVENCION<br>ACEITE OLIVA |        |
| EMERGENCY_CESAREAN_SECTION | 1,00 | Recuento                          | 31                 | 9                            | 40     |
|                            |      | % dentro de<br>GRUPO_ALEATORIZADO | 7,0%               | 2,1%                         | 4,6%   |
|                            | 2,00 | Recuento                          | 409                | 425                          | 834    |
|                            |      | % dentro de<br>GRUPO_ALEATORIZADO | 93,0%              | 97,9%                        | 95,4%  |
| Total                      |      | Recuento                          | 440                | 434                          | 874    |
|                            |      | % dentro de<br>GRUPO_ALEATORIZADO | 100,0%             | 100,0%                       | 100,0% |

**Pruebas de chi-cuadrado**

|                                         | Valor               | gl | Sig. asintótica<br>(bilateral) | Sig. exacta<br>(bilateral) | Sig. exacta<br>(unilateral) |
|-----------------------------------------|---------------------|----|--------------------------------|----------------------------|-----------------------------|
| Chi-cuadrado de Pearson                 | 12,366 <sup>a</sup> | 1  | ,000                           |                            |                             |
| Corrección por continuidad <sup>b</sup> | 11,254              | 1  | ,001                           |                            |                             |
| Razón de verosimilitudes                | 13,064              | 1  | ,000                           |                            |                             |
| Estadístico exacto de Fisher            |                     |    |                                | ,001                       | ,000                        |
| Asociación lineal por lineal            | 12,352              | 1  | ,000                           |                            |                             |

|                    |     |  |  |  |
|--------------------|-----|--|--|--|
| N de casos válidos | 874 |  |  |  |
|--------------------|-----|--|--|--|

- a. 0 casillas (,0%) tienen una frecuencia esperada inferior a 5. La frecuencia mínima esperada es 19,86.  
b. Calculado sólo para una tabla de 2x2.

## PT YES VS NO \* GRUPO\_ALEATORIZADO

Tabla de contingencia

|              |      |                                   | GRUPO_ALEATORIZADO |                              | Total  |
|--------------|------|-----------------------------------|--------------------|------------------------------|--------|
|              |      |                                   | CONTROL            | INTERVENCION<br>ACEITE OLIVA |        |
| PT YES VS NO | 1,00 | Recuento                          | 68                 | 14                           | 82     |
|              |      | % dentro de<br>GRUPO_ALEATORIZADO | 15,5%              | 3,2%                         | 9,4%   |
|              | 2,00 | Recuento                          | 372                | 420                          | 792    |
|              |      | % dentro de<br>GRUPO_ALEATORIZADO | 84,5%              | 96,8%                        | 90,6%  |
| Total        |      | Recuento                          | 440                | 434                          | 874    |
|              |      | % dentro de<br>GRUPO_ALEATORIZADO | 100,0%             | 100,0%                       | 100,0% |

Pruebas de chi-cuadrado

|                                         | Valor               | gl | Sig. asintótica<br>(bilateral) | Sig. exacta<br>(bilateral) | Sig. exacta<br>(unilateral) |
|-----------------------------------------|---------------------|----|--------------------------------|----------------------------|-----------------------------|
| Chi-cuadrado de Pearson                 | 38,431 <sup>a</sup> | 1  | ,000                           |                            |                             |
| Corrección por continuidad <sup>b</sup> | 37,006              | 1  | ,000                           |                            |                             |
| Razón de verosimilitudes                | 41,591              | 1  | ,000                           |                            |                             |
| Estadístico exacto de Fisher            |                     |    |                                | ,000                       | ,000                        |
| Asociación lineal por lineal            | 38,387              | 1  | ,000                           |                            |                             |
| N de casos válidos                      | 874                 |    |                                |                            |                             |

- a. 0 casillas (,0%) tienen una frecuencia esperada inferior a 5. La frecuencia mínima esperada es 40,72.  
b. Calculado sólo para una tabla de 2x2.

## DAÑO\_PLEXOBRAQUIAL \* GRUPO\_ALEATORIZADO

Tabla de contingencia

|                    |    |                                   | GRUPO_ALEATORIZADO |                              | Total  |
|--------------------|----|-----------------------------------|--------------------|------------------------------|--------|
|                    |    |                                   | CONTROL            | INTERVENCION<br>ACEITE OLIVA |        |
| DAÑO_PLEXOBRAQUIAL | SI | Recuento                          | 1                  | 0                            | 1      |
|                    |    | % dentro de<br>GRUPO_ALEATORIZADO | ,2%                | ,0%                          | ,1%    |
|                    | NO | Recuento                          | 439                | 434                          | 873    |
|                    |    | % dentro de<br>GRUPO_ALEATORIZADO | 99,8%              | 100,0%                       | 99,9%  |
| Total              |    | Recuento                          | 440                | 434                          | 874    |
|                    |    | % dentro de<br>GRUPO_ALEATORIZADO | 100,0%             | 100,0%                       | 100,0% |

Pruebas de chi-cuadrado

|                                         | Valor             | gl | Sig. asintótica<br>(bilateral) | Sig. exacta<br>(bilateral) | Sig. exacta<br>(unilateral) |
|-----------------------------------------|-------------------|----|--------------------------------|----------------------------|-----------------------------|
| Chi-cuadrado de Pearson                 | ,987 <sup>a</sup> | 1  | ,320                           |                            |                             |
| Corrección por continuidad <sup>b</sup> | ,000              | 1  | 1,000                          |                            |                             |
| Razón de verosimilitudes                | 1,374             | 1  | ,241                           |                            |                             |
| Estadístico exacto de Fisher            |                   |    |                                | 1,000                      | ,503                        |
| Asociación lineal por lineal            | ,986              | 1  | ,321                           |                            |                             |
| N de casos válidos                      | 874               |    |                                |                            |                             |

a. 2 casillas (50,0%) tienen una frecuencia esperada inferior a 5. La frecuencia mínima esperada es ,50.

b. Calculado sólo para una tabla de 2x2.

## PREMATURO <37 VS >=37 \* GRUPO\_ALEATORIZADO

Tabla de contingencia

|                       |      |                                   | GRUPO_ALEATORIZADO |                              | Total  |
|-----------------------|------|-----------------------------------|--------------------|------------------------------|--------|
|                       |      |                                   | CONTROL            | INTERVENCION<br>ACEITE OLIVA |        |
| PREMATURO <37 VS >=37 | 1,00 | Recuento                          | 17                 | 5                            | 22     |
|                       |      | % dentro de<br>GRUPO_ALEATORIZADO | 3,9%               | 1,2%                         | 2,5%   |
|                       | 2,00 | Recuento                          | 423                | 429                          | 852    |
|                       |      | % dentro de<br>GRUPO_ALEATORIZADO | 96,1%              | 98,8%                        | 97,5%  |
| Total                 |      | Recuento                          | 440                | 434                          | 874    |
|                       |      | % dentro de<br>GRUPO_ALEATORIZADO | 100,0%             | 100,0%                       | 100,0% |

**Pruebas de chi-cuadrado**

|                                         | Valor              | gl | Sig. asintótica<br>(bilateral) | Sig. exacta<br>(bilateral) | Sig. exacta<br>(unilateral) |
|-----------------------------------------|--------------------|----|--------------------------------|----------------------------|-----------------------------|
| Chi-cuadrado de Pearson                 | 6,547 <sup>a</sup> | 1  | ,011                           |                            |                             |
| Corrección por continuidad <sup>b</sup> | 5,488              | 1  | ,019                           |                            |                             |
| Razón de verosimilitudes                | 6,917              | 1  | ,009                           |                            |                             |
| Estadístico exacto de Fisher            |                    |    |                                | ,016                       | ,009                        |
| Asociación lineal por lineal            | 6,539              | 1  | ,011                           |                            |                             |
| N de casos válidos                      | 874                |    |                                |                            |                             |

a. 0 casillas (,0%) tienen una frecuencia esperada inferior a 5. La frecuencia mínima esperada es 10,92.

b. Calculado sólo para una tabla de 2x2.

**LGA> 90 PERCENTILE \* GRUPO\_ALEATORIZADO**

**Tabla de contingencia**

|                    |      |                                   | GRUPO_ALEATORIZADO |                              | Total |
|--------------------|------|-----------------------------------|--------------------|------------------------------|-------|
|                    |      |                                   | CONTROL            | INTERVENCION<br>ACEITE OLIVA |       |
| LGA> 90 PERCENTILE | 1,00 | Recuento                          | 18                 | 4                            | 22    |
|                    |      | % dentro de<br>GRUPO_ALEATORIZADO | 4,1%               | ,9%                          | 2,5%  |



|       |                                |        |        |        |
|-------|--------------------------------|--------|--------|--------|
| 2,00  | Recuento                       | 422    | 430    | 852    |
|       | % dentro de GRUPO_ALEATORIZADO | 95,9%  | 99,1%  | 97,5%  |
| Total | Recuento                       | 440    | 434    | 874    |
|       | % dentro de GRUPO_ALEATORIZADO | 100,0% | 100,0% | 100,0% |

**Pruebas de chi-cuadrado**

|                                         | Valor              | gl | Sig. asintótica (bilateral) | Sig. exacta (bilateral) | Sig. exacta (unilateral) |
|-----------------------------------------|--------------------|----|-----------------------------|-------------------------|--------------------------|
| Chi-cuadrado de Pearson                 | 8,943 <sup>a</sup> | 1  | ,003                        |                         |                          |
| Corrección por continuidad <sup>b</sup> | 7,699              | 1  | ,006                        |                         |                          |
| Razón de verosimilitudes                | 9,670              | 1  | ,002                        |                         |                          |
| Estadístico exacto de Fisher            |                    |    |                             | ,004                    | ,002                     |
| Asociación lineal por lineal            | 8,933              | 1  | ,003                        |                         |                          |
| N de casos válidos                      | 874                |    |                             |                         |                          |

a. 0 casillas (,0%) tienen una frecuencia esperada inferior a 5. La frecuencia mínima esperada es 10,92.

b. Calculado sólo para una tabla de 2x2.

**SGA < 10 PERCENTILE \* GRUPO\_ALEATORIZADO**

**Tabla de contingencia**

|                     |      |                                | GRUPO_ALEATORIZADO |                           | Total  |
|---------------------|------|--------------------------------|--------------------|---------------------------|--------|
|                     |      |                                | CONTROL            | INTERVENCION ACEITE OLIVA |        |
| SGA < 10 PERCENTILE | 1,00 | Recuento                       | 25                 | 5                         | 30     |
|                     |      | % dentro de GRUPO_ALEATORIZADO | 5,7%               | 1,2%                      | 3,4%   |
|                     | 2,00 | Recuento                       | 415                | 429                       | 844    |
|                     |      | % dentro de GRUPO_ALEATORIZADO | 94,3%              | 98,8%                     | 96,6%  |
| Total               |      | Recuento                       | 440                | 434                       | 874    |
|                     |      | % dentro de GRUPO_ALEATORIZADO | 100,0%             | 100,0%                    | 100,0% |

**Pruebas de chi-cuadrado**

|                                         | Valor               | gl | Sig. asintótica<br>(bilateral) | Sig. exacta<br>(bilateral) | Sig. exacta<br>(unilateral) |
|-----------------------------------------|---------------------|----|--------------------------------|----------------------------|-----------------------------|
| Chi-cuadrado de Pearson                 | 13,525 <sup>a</sup> | 1  | ,000                           |                            |                             |
| Corrección por continuidad <sup>b</sup> | 12,193              | 1  | ,000                           |                            |                             |
| Razón de verosimilitudes                | 14,746              | 1  | ,000                           |                            |                             |
| Estadístico exacto de Fisher            |                     |    |                                | ,000                       | ,000                        |
| Asociación lineal por lineal            | 13,510              | 1  | ,000                           |                            |                             |
| N de casos válidos                      | 874                 |    |                                |                            |                             |

a. 0 casillas (,0%) tienen una frecuencia esperada inferior a 5. La frecuencia mínima esperada es 14,90.

b. Calculado sólo para una tabla de 2x2.

**HIPOGLUCEMIA \* GRUPO\_ALEATORIZADO**

**Tabla de contingencia**

|              |    |                                   | GRUPO_ALEATORIZADO |                              | Total  |
|--------------|----|-----------------------------------|--------------------|------------------------------|--------|
|              |    |                                   | CONTROL            | INTERVENCION<br>ACEITE OLIVA |        |
| HIPOGLUCEMIA | SI | Recuento                          | 9                  | 3                            | 12     |
|              |    | % dentro de<br>GRUPO_ALEATORIZADO | 2,0%               | ,7%                          | 1,4%   |
|              | NO | Recuento                          | 431                | 431                          | 862    |
|              |    | % dentro de<br>GRUPO_ALEATORIZADO | 98,0%              | 99,3%                        | 98,6%  |
| Total        |    | Recuento                          | 440                | 434                          | 874    |
|              |    | % dentro de<br>GRUPO_ALEATORIZADO | 100,0%             | 100,0%                       | 100,0% |

**Pruebas de chi-cuadrado**

|                         | Valor              | gl | Sig. asintótica<br>(bilateral) | Sig. exacta<br>(bilateral) | Sig. exacta<br>(unilateral) |
|-------------------------|--------------------|----|--------------------------------|----------------------------|-----------------------------|
| Chi-cuadrado de Pearson | 2,959 <sup>a</sup> | 1  | ,085                           |                            |                             |

|                                         |       |   |      |      |      |
|-----------------------------------------|-------|---|------|------|------|
| Corrección por continuidad <sup>b</sup> | 2,043 | 1 | ,153 |      |      |
| Razón de verosimilitudes                | 3,098 | 1 | ,078 |      |      |
| Estadístico exacto de Fisher            |       |   |      | ,143 | ,075 |
| Asociación lineal por lineal            | 2,956 | 1 | ,086 |      |      |
| N de casos válidos                      | 874   |   |      |      |      |

a. 0 casillas (,0%) tienen una frecuencia esperada inferior a 5. La frecuencia mínima esperada es 5,96.

b. Calculado sólo para una tabla de 2x2.

## DISTRES\_RESPIRATORIO \* GRUPO\_ALEATORIZADO

Tabla de contingencia

|                      |    |                                   | GRUPO_ALEATORIZADO |                              | Total  |
|----------------------|----|-----------------------------------|--------------------|------------------------------|--------|
|                      |    |                                   | CONTROL            | INTERVENCION<br>ACEITE OLIVA |        |
| DISTRES_RESPIRATORIO | SI | Recuento                          | 4                  | 3                            | 7      |
|                      |    | % dentro de<br>GRUPO_ALEATORIZADO | ,9%                | ,7%                          | ,8%    |
|                      | NO | Recuento                          | 436                | 431                          | 867    |
|                      |    | % dentro de<br>GRUPO_ALEATORIZADO | 99,1%              | 99,3%                        | 99,2%  |
| Total                |    | Recuento                          | 440                | 434                          | 874    |
|                      |    | % dentro de<br>GRUPO_ALEATORIZADO | 100,0%             | 100,0%                       | 100,0% |

Pruebas de chi-cuadrado

|                                         | Valor             | gl | Sig. asintótica<br>(bilateral) | Sig. exacta<br>(bilateral) | Sig. exacta<br>(unilateral) |
|-----------------------------------------|-------------------|----|--------------------------------|----------------------------|-----------------------------|
| Chi-cuadrado de Pearson                 | ,131 <sup>a</sup> | 1  | ,718                           |                            |                             |
| Corrección por continuidad <sup>b</sup> | ,000              | 1  | 1,000                          |                            |                             |
| Razón de verosimilitudes                | ,131              | 1  | ,717                           |                            |                             |
| Estadístico exacto de Fisher            |                   |    |                                | 1,000                      | ,508                        |
| Asociación lineal por lineal            | ,130              | 1  | ,718                           |                            |                             |
| N de casos válidos                      | 874               |    |                                |                            |                             |

**Pruebas de chi-cuadrado**

|                                         | Valor             | gl | Sig. asintótica<br>(bilateral) | Sig. exacta<br>(bilateral) | Sig. exacta<br>(unilateral) |
|-----------------------------------------|-------------------|----|--------------------------------|----------------------------|-----------------------------|
| Chi-cuadrado de Pearson                 | ,131 <sup>a</sup> | 1  | ,718                           |                            |                             |
| Corrección por continuidad <sup>b</sup> | ,000              | 1  | 1,000                          |                            |                             |
| Razón de verosimilitudes                | ,131              | 1  | ,717                           |                            |                             |
| Estadístico exacto de Fisher            |                   |    |                                | 1,000                      | ,508                        |
| Asociación lineal por lineal            | ,130              | 1  | ,718                           |                            |                             |
| N de casos válidos                      | 874               |    |                                |                            |                             |

a. 2 casillas (50,0%) tienen una frecuencia esperada inferior a 5. La frecuencia mínima esperada es 3,48.

b. Calculado sólo para una tabla de 2x2.

**HPERBILIRRUNEMIA\_YES\_VS\_NO \* GRUPO\_ALEATORIZADO**

**Tabla de contingencia**

|                                |      |                                   | GRUPO_ALEATORIZADO |                              | Total  |
|--------------------------------|------|-----------------------------------|--------------------|------------------------------|--------|
|                                |      |                                   | CONTROL            | INTERVENCION<br>ACEITE OLIVA |        |
| HPERBILIRRUNEMIA_YES_VS<br>_NO | 1,00 | Recuento                          | 31                 | 22                           | 53     |
|                                |      | % dentro de<br>GRUPO_ALEATORIZADO | 7,0%               | 5,1%                         | 6,1%   |
|                                | 2,00 | Recuento                          | 409                | 412                          | 821    |
|                                |      | % dentro de<br>GRUPO_ALEATORIZADO | 93,0%              | 94,9%                        | 93,9%  |
| Total                          |      | Recuento                          | 440                | 434                          | 874    |
|                                |      | % dentro de<br>GRUPO_ALEATORIZADO | 100,0%             | 100,0%                       | 100,0% |

**Pruebas de chi-cuadrado**

|                                         | Valor              | gl | Sig. asintótica<br>(bilateral) | Sig. exacta<br>(bilateral) | Sig. exacta<br>(unilateral) |
|-----------------------------------------|--------------------|----|--------------------------------|----------------------------|-----------------------------|
| Chi-cuadrado de Pearson                 | 1,498 <sup>a</sup> | 1  | ,221                           |                            |                             |
| Corrección por continuidad <sup>b</sup> | 1,171              | 1  | ,279                           |                            |                             |
| Razón de verosimilitudes                | 1,506              | 1  | ,220                           |                            |                             |

|                              |       |   |      |      |      |
|------------------------------|-------|---|------|------|------|
| Estadístico exacto de Fisher |       |   |      | ,257 | ,140 |
| Asociación lineal por lineal | 1,496 | 1 | ,221 |      |      |
| N de casos válidos           | 874   |   |      |      |      |

a. 0 casillas (,0%) tienen una frecuencia esperada inferior a 5. La frecuencia mínima esperada es 26,32.

b. Calculado sólo para una tabla de 2x2.

## NICU\_OBSERVATION\_STANCE \* GRUPO\_ALEATORIZADO

Tabla de contingencia

|                              |      |                                   | GRUPO_ALEATORIZADO |                              | Total  |
|------------------------------|------|-----------------------------------|--------------------|------------------------------|--------|
|                              |      |                                   | CONTROL            | INTERVENCION<br>ACEITE OLIVA |        |
| NICU_OBSERVATION_STANCE<br>E | 1,00 | Recuento                          | 14                 | 8                            | 22     |
|                              |      | % dentro de<br>GRUPO_ALEATORIZADO | 3,2%               | 1,8%                         | 2,5%   |
|                              | 2,00 | Recuento                          | 426                | 426                          | 852    |
|                              |      | % dentro de<br>GRUPO_ALEATORIZADO | 96,8%              | 98,2%                        | 97,5%  |
| Total                        |      | Recuento                          | 440                | 434                          | 874    |
|                              |      | % dentro de<br>GRUPO_ALEATORIZADO | 100,0%             | 100,0%                       | 100,0% |

Pruebas de chi-cuadrado

|                                         | Valor              | gl | Sig. asintótica<br>(bilateral) | Sig. exacta<br>(bilateral) | Sig. exacta<br>(unilateral) |
|-----------------------------------------|--------------------|----|--------------------------------|----------------------------|-----------------------------|
| Chi-cuadrado de Pearson                 | 1,595 <sup>a</sup> | 1  | ,207                           |                            |                             |
| Corrección por continuidad <sup>b</sup> | 1,096              | 1  | ,295                           |                            |                             |
| Razón de verosimilitudes                | 1,616              | 1  | ,204                           |                            |                             |
| Estadístico exacto de Fisher            |                    |    |                                | ,280                       | ,147                        |
| Asociación lineal por lineal            | 1,593              | 1  | ,207                           |                            |                             |
| N de casos válidos                      | 874                |    |                                |                            |                             |

a. 0 casillas (,0%) tienen una frecuencia esperada inferior a 5. La frecuencia mínima esperada es 10,92.

b. Calculado sólo para una tabla de 2x2.

Zou G. A Modified Poisson Regression Approach to Prospective Studies with Binary Data. Am J Epidemiol 2004; 159(7):702-6.

| GESTACIONAL DIABETES MELLITUS |                            |       |                                                                   |       |                                                        |       |
|-------------------------------|----------------------------|-------|-------------------------------------------------------------------|-------|--------------------------------------------------------|-------|
|                               | Zhang and Yu:<br>RR(95%CI) | p     | Poisson regression<br>with robust error<br>variance:<br>RR(95%CI) | p     | Cox regression with<br>robust variance: RR<br>(95% CI) | p     |
| Crude                         | 0.73 (0.55-0.95)           | 0.020 | 0.73 (0.56-0.95)                                                  | 0.020 | 0.73 (0.56-0.95)                                       | 0.020 |
| Model 1                       | 0.72 (0.54-0.95)           | 0.018 | 0.73 (0.55-0.95)                                                  | 0.019 | 0.73 (0.55-0.95)                                       | 0.019 |
| Model 2                       | 0.74 (0.55-0.98)           | 0.037 | 0.75 (0.58-0.99)                                                  | 0.041 | 0.75 (0.57-0.99)                                       | 0.041 |
| Modelo 3                      | 0.73 (0.55-0.96)           | 0.021 | 0.73 (0.56-0.97)                                                  | 0.022 | 0.73 (0.56-0.96)                                       | 0.022 |
| Model 1 +2                    | 0.73 (0.54-0.97)           | 0.031 | 0.74 (0.56-0.97)                                                  | 0.033 | 0.74 (0.57-0.98)                                       | 0.033 |
| Modelo1 + 2 +<br>3            | 0.74 (0.55-0.98)           | 0.037 | 0.75 (0.57-0.98)                                                  | 0.039 | 0.75 (0.57-0.98)                                       | 0.039 |

Model 1: adjusted for age (continuous), ethnicity and parity.

Model 2: adjusted for BMI (continuous).

Model 3: adjusted for gestacional, personal and family history, smoker (categorical: never, current, former smoker).

| PREMATURITY |                            |       |                                                                   |       |                                                        |       |
|-------------|----------------------------|-------|-------------------------------------------------------------------|-------|--------------------------------------------------------|-------|
|             | Zhang and Yu:<br>RR(95%CI) | p     | Poisson regression<br>with robust error<br>variance:<br>RR(95%CI) | p     | Cox regression with<br>robust variance: RR<br>(95% CI) | p     |
| Crude       | 0.27 (0.10-0.75)           | 0.011 | 0.28 (0.10-0.75)                                                  | 0.011 | 0.28 (0.11-0.75)                                       | 0.011 |
| Model 1     | 0.29 (0.11-0.78)           | 0.014 | 0.30 (0.11-0.79)                                                  | 0.016 | 0.30 (0.11-0.79)                                       | 0.016 |
| Model 2     | 0.34 (0.12-0.94)           | 0.038 | 0.34 (0.12-0.96)                                                  | 0.041 | 0.34 (0.12-0.96)                                       | 0.041 |
| Modelo 3    | 0.29 (0.11-0.77)           | 0.013 | 0.29 (0.11-0.77)                                                  | 0.013 | 0.29 (0.11-0.77)                                       | 0.013 |

Model 1: adjusted for age (continuous), ethnicity and parity.

Model 2: adjusted for BMI (continuous).

Model 3: adjusted for gestacional, personal and family history, smoker (categorical: never, current, former smoker).

| LARGE FOR GESTACIONAL AGE |                            |       |                                                                   |       |                                                        |       |
|---------------------------|----------------------------|-------|-------------------------------------------------------------------|-------|--------------------------------------------------------|-------|
|                           | Zhang and Yu:<br>RR(95%CI) | p     | Poisson regression<br>with robust error<br>variance:<br>RR(95%CI) | p     | Cox regression with<br>robust variance: RR<br>(95% CI) | p     |
| Crude                     | 0.20 (0.07-0.59)           | 0.003 | 0.20 (0.07-0.59)                                                  | 0.003 | 0.20 (0.07-0.59)                                       | 0.003 |
| Model 1                   | 0.21 (0.07-0.60)           | 0.004 | 0.21 (0.07-0.60)                                                  | 0.004 | 0.21 (0.07-0.30)                                       | 0.004 |
| Model 2                   | 0.24 (0.08-0.70)           | 0.009 | 0.24 (0.08-0.71)                                                  | 0.011 | 0.24 (0.08-0.72)                                       | 0.011 |
| Modelo 3                  | 0.20 (0.07-0.58)           | 0.002 | 0.19 (0.07-0.57)                                                  | 0.003 | 0.20 (0.07-0.57)                                       | 0.003 |

Model 1: adjusted for age (continuous), ethnicity and parity.

Model 2: adjusted for BMI (continuous).

Model 3: adjusted for gestacional, personal and family history, smoker (categorical: never, current, former smoker).

| SMALL FOR GESTATIONAL AGE |                            |       |                                                                   |       |                                                        |       |
|---------------------------|----------------------------|-------|-------------------------------------------------------------------|-------|--------------------------------------------------------|-------|
|                           | Zhang and Yu:<br>RR(95%CI) | p     | Poisson regression<br>with robust error<br>variance:<br>RR(95%CI) | p     | Cox regression with<br>robust variance: RR<br>(95% CI) | p     |
| Crude                     | 0.20 (0.08-0.52)           | 0.001 | 0.20 (0.08-0.52)                                                  | 0.001 | 0.20 (0.08-0.52)                                       | 0.001 |
| Model 1                   | 0.20 (0.08-0.52)           | 0.001 | 0.20 (0.08-0.53)                                                  | 0.001 | 0.20 (0.08-0.53)                                       | 0.001 |

|          |                  |       |                  |       |                  |       |
|----------|------------------|-------|------------------|-------|------------------|-------|
| Model 2  | 0.22 (0.08-0.58) | 0.002 | 0.22 (0.09-0.57) | 0.002 | 0.22 (0.09-0.57) | 0.002 |
| Modelo 3 | 0.21 (0.08-0.54) | 0.001 | 0.21 (0.08-0.54) | 0.001 | 0.21 (0.08-0.54) | 0.001 |

Model 1: adjusted for age (continuous), ethnicity and parity.

Model 2: adjusted for BMI (continuous).

Model 3: adjusted for gestacional, personal and family history, smoker (categorical: never, current, former smoker).

| PERIANAL TRAUMA |                            |        |                                                                   |        |                                                        |        |
|-----------------|----------------------------|--------|-------------------------------------------------------------------|--------|--------------------------------------------------------|--------|
|                 | Zhang and Yu:<br>RR(95%CI) | p      | Poisson regression<br>with robust error<br>variance:<br>RR(95%CI) | p      | Cox regression with<br>robust variance: RR<br>(95% CI) | p      |
| Crude           | 0.20 (0.08-0.53)           | <0.001 | 0.21 (0.12-0.36)                                                  | <0.001 | 0.21 (0.12-0.36)                                       | <0.001 |
| Model 1         | 0.20 (0.08-0.52)           | <0.001 | 0.20 (0.11-0.35)                                                  | <0.001 | 0.20 (0.11-0.35)                                       | <0.001 |
| Model 2         | 0.22 (0.08-0.59)           | <0.001 | 0.21 (0.12-0.37)                                                  | <0.001 | 0.21 (0.12-0.37)                                       | <0.001 |
| Modelo 3        | 0.21 (0.08-0.54)           | <0.001 | 0.21 (0.12-0.36)                                                  | <0.001 | 0.21 (0.12-0.36)                                       | <0.001 |

Model 1: adjusted for age (continuous), ethnicity and parity.

Model 2: adjusted for BMI (continuous)

Model 3: adjusted for gestacional, personal and family history, smoker (categorical: never, current, former smoker).

| EMERGENCY CESAREAN |                            |       |                                                                   |       |                                                        |       |
|--------------------|----------------------------|-------|-------------------------------------------------------------------|-------|--------------------------------------------------------|-------|
|                    | Zhang and Yu:<br>RR(95%CI) | p     | Poisson regression<br>with robust error<br>variance:<br>RR(95%CI) | p     | Cox regression with<br>robust variance: RR<br>(95% CI) | p     |
| Crude              | 0.29 (0.14-0.61)           | 0.001 | 0.29 (0.14-0.61)                                                  | 0.001 | 0.29 (0.14-0.61)                                       | 0.001 |
| Model 1            | 0.28 (0.13-0.58)           | 0.001 | 0.28 (0.14-0.59)                                                  | 0.001 | 0.28 (0.14-0.58)                                       | 0.001 |
| Model 2            | 0.32 (0.15-0.67)           | 0.002 | 0.32 (0.16-0.67)                                                  | 0.003 | 0.32 (0.16-0.67)                                       | 0.003 |
| Modelo 3           | 0.30 (0.14-0.62)           | 0.001 | 0.30 (0.14-0.63)                                                  | 0.001 | 0.30 (0.1-0.63)                                        | 0.001 |

Model 1: adjusted for age (continuous), ethnicity and parity.

Model 2: adjusted for BMI (continuous).

Model 3: adjusted for gestacional, personal and family history, smoker (categorical: never, current, former smoker).

| URINARY TRACT INFECTION |                            |        |                                                                   |        |                                                        |        |
|-------------------------|----------------------------|--------|-------------------------------------------------------------------|--------|--------------------------------------------------------|--------|
|                         | Zhang and Yu:<br>RR(95%CI) | p      | Poisson regression<br>with robust error<br>variance:<br>RR(95%CI) | p      | Cox regression with<br>robust variance: RR<br>(95% CI) | p      |
| Crude                   | 0.40 (0.25-0.63)           | <0.001 | 0.40 (0.25-0.63)                                                  | <0.001 | 0.40 (0.25-0.63)                                       | <0.001 |
| Model 1                 | 0.40 (0.25-0.64)           | <0.001 | 0.41 (0.26-0.64)                                                  | <0.001 | 0.41 (0.26-0.64)                                       | <0.001 |
| Model 2                 | 0.41 (0.25-0.65)           | <0.001 | 0.41 (0.26-0.65)                                                  | <0.001 | 0.41 (0.26-0.65)                                       | <0.001 |
| Modelo 3                | 0.41 (0.25-0.64)           | <0.001 | 0.41 (0.26-0.64)                                                  | <0.001 | 0.41 (0.26-0.64)                                       | <0.001 |

Model 1: adjusted for age (continuous), ethnicity and parity.

Model 2: adjusted for BMI (continuous).

Model 3: adjusted for gestacional, personal and family history, smoker (categorical: never, current, former smoker).

| INSULIN-TREATED GDM |                            |   |                                                      |   |                                                        |   |
|---------------------|----------------------------|---|------------------------------------------------------|---|--------------------------------------------------------|---|
|                     | Zhang and Yu:<br>RR(95%CI) | p | Poisson regression<br>with robust error<br>variance: | p | Cox regression with<br>robust variance: RR<br>(95% CI) | p |

|          |                  |       | RR(95%CI)        |       |                  |       |
|----------|------------------|-------|------------------|-------|------------------|-------|
| Crude    | 0.43 (0.24-0.78) | 0.005 | 0.43 (0.24-0.78) | 0.006 | 0.43 (0.24-0.78) | 0.006 |
| Model 1  | 0.45 (0.24-0.80) | 0.007 | 0.44 (0.25-0.81) | 0.008 | 0.44 (0.25-0.81) | 0.008 |
| Model 2  | 0.50 (0.27-0.91) | 0.024 | 0.51 (0.28-0.93) | 0.028 | 0.51 (0.28-0.93) | 0.028 |
| Modelo 3 | 0.41 (0.24-0.78) | 0.005 | 0.43 (0.24-0.78) | 0.005 | 0.43 (0.24-0.78) | 0.005 |

Model 1: adjusted for age (continuous), ethnicity and parity.

Model 2: adjusted for BMI (continuous).

Model 3: adjusted for gestacional, personal and family history, smoker (categorical: never, current, former smoker).

The methods used offer estimations of the effect size (RR) and intervals confidence precisions very close. The conclusions from the point of view of statistical significance are the same.
